1 **Palbociclib-mediated cell cycle arrest can occur in the absence of the CDK**  
2 **inhibitors p21 and p27**

3

4 Betheney R. Pennycook<sup>1,2</sup>, Alexis R. Barr<sup>\*1,2</sup>

5

6 <sup>1</sup>Institute of Clinical Sciences, Faculty of Medicine, Imperial College London, Du Cane  
7 Road, London W12 0NN, UK; <sup>2</sup>MRC London Institute of Medical Sciences, Imperial  
8 College London, Du Cane Road, London W12 0NN, UK

9

10 \*Corresponding author, [abarr@ic.ac.uk](mailto:abarr@ic.ac.uk)

11

12 **Abstract**

13 The use of CDK4/6 inhibitors in the treatment of a wide range of cancers is an area of  
14 ongoing investigation. Despite their increasing clinical use, there is limited  
15 understanding of the determinants of sensitivity and resistance to these drugs. Recent  
16 data has cast doubt on how CDK4/6 inhibitors arrest proliferation, provoking renewed  
17 interest in the role(s) of CDK4/6 in driving cell proliferation. As the use of CDK4/6  
18 inhibitors in cancer therapies becomes more prominent, an understanding of their  
19 effect on the cell cycle becomes more urgent. Here, we investigate the mechanism of  
20 action of CDK4/6 inhibitors in promoting cell cycle arrest. Two main models explain  
21 how CDK4/6 inhibitors cause G1 cell cycle arrest, which differ in their dependence on  
22 the CDK inhibitor proteins p21 and p27. We have used live and fixed single-cell  
23 quantitative imaging, with inducible degradation systems, to address the roles of p21  
24 and p27 in the mechanism of action of CDK4/6 inhibitors. We find that CDK4/6  
25 inhibitors can initiate and maintain a cell cycle arrest without p21 or p27. This work  
26 clarifies our current understanding of the mechanism of action of CDK4/6 inhibitors  
27 and has implications for cancer treatment and patient stratification.

## 28 **Introduction**

29 CDK4/6 inhibitors have garnered interest as cancer treatments due to their efficiency  
30 in inhibiting cell proliferation. Three small-molecule CDK4/6 inhibitors (Palbociclib,  
31 Abemaciclib and Ribociclib) are clinically approved for the treatment of metastatic  
32 ER+/HER2- breast cancer, and their use in the treatment of other cancers is an area  
33 of active investigation (Álvarez-Fernández & Malumbres, 2020; Dickler et al., 2017;  
34 Finn et al., 2016; Fry et al., 2004; Gelbert et al., 2014; Hortobagyi et al., 2016; Rader  
35 et al., 2013; Sledge et al., 2017; Tripathy et al., 2017). However, not all patients  
36 respond to these drugs and it is unclear why. Understanding more about the  
37 mechanism of action of CDK4/6 inhibitors, and how they inhibit cell proliferation, will  
38 help to stratify patients for treatment based on biomarkers (Álvarez-Fernández &  
39 Malumbres, 2020; Spring et al., 2020).

40

41 While the premise for the clinical use of CDK4/6 inhibitors is based on a “canonical”  
42 model of CDK4/6 activity, recent work has highlighted gaps in our understanding of  
43 the role of CDK4/6 in cell cycle entry (Pennycook & Barr, 2020; Hume et al., 2020;  
44 Rubin et al., 2020). In this canonical model, Cyclin D:CDK4/6 has a catalytic role,  
45 phosphorylating the transcriptional inhibitor Retinoblastoma protein (Rb) during G1,  
46 and partially relieving its inhibition of E2F-mediated transcription. This initiates  
47 expression of genes required for cell cycle entry, including Cyclin E. Later in G1,  
48 increasing Cyclin E:CDK2 activity results in the hyperphosphorylation and complete  
49 inhibition of Rb, allowing full activation of E2F-dependent transcription and entry into  
50 S-phase. More recent data has called this model into question, yet still supports a  
51 primarily catalytic role for CDK4/6 in cell cycle entry (Narasimha et al., 2014). Indeed,  
52 the catalytic activity of CDK4/6 towards Rb has been shown to be a major driver of  
53 proliferation (Chung et al., 2019; Harbour et al., 1999; Lundberg & Weinberg, 1998;  
54 Topacio et al., 2019; Yang et al., 2020). However, CDK4/6 may also promote cell cycle  
55 entry through a non-catalytic role, sequestering the Cip/Kip Cdk inhibitors, p21 and  
56 p27, away from CDK2, thus promoting CDK2 activity (Polyak et al., 1994; Sherr &  
57 Roberts, 1999). Whilst p21 and p27 inhibit CDK2 activity, they have a more  
58 complicated relationship with Cyclin D:CDK4/6. p21 and p27 are necessary for the  
59 formation of functional Cyclin D:CDK4/6 complexes and promote complex assembly  
60 (Cheng et al., 1999; Guiley et al., 2019; Labaer et al., 1997; Ray et al., 2009). In  
61 addition, p27 facilitates the phosphorylation of the T-loop in CDK4 by CDK activating

62 kinase (CAK), which is required for CDK4 kinase activity (Guiley et al., 2019).  
63 However, p21/p27 binding can also inhibit Cyclin D:CDK4/6 activity (Guiley et al.,  
64 2019; Ray et al., 2009). Other roles for CDK4/6 in cell cycle entry have been suggested  
65 (Caillot et al., 2020; Hydrbring et al., 2016; Wang et al., 2017). For example, CDK4/6  
66 substrates include proteins controlling mitochondrial function and glycolysis, co-  
67 ordinating the cell cycle and metabolism (Caillot et al., 2020; Salazar-Roa &  
68 Malumbres, 2017; Wang et al., 2017). Other studies have reported that CDK4/6 are  
69 able to control transcription in a kinase-independent manner (Hydrbring et al., 2016;  
70 Kollmann et al., 2013). Thus, the precise mechanism by which CDK4/6 activity leads  
71 to increased CDK2 activity and cell cycle entry during G1 is unclear.

72  
73 Our current understanding of CDK4/6 activity suggests two ways by which CDK4/6  
74 inhibitors could act to block proliferation. Our first assumption, based on canonical  
75 models of cell cycle entry, is direct CDK4/6 kinase inhibition resulting in cell cycle  
76 arrest (Chung et al., 2019; Fry et al., 2004; Toogood et al., 2005). However, it has  
77 been reported that CDK4/6 inhibitors are able to arrest cell cycle progression even in  
78 the presence of catalytically inactive CDK4/6 (Schade et al., 2019). Further, whilst *RB1*  
79 (encoding Rb) status may be an important biomarker for CDK4/6 inhibitor sensitivity,  
80 some Rb-deficient tumour cells remain sensitive (Álvarez-Fernández & Malumbres,  
81 2020). An alternative, indirect model of CDK4/6 inhibitor action resolves this issue,  
82 implicating CDK2 inhibition as the cause of G1 arrest. Recent experimental work  
83 suggests that the CDK4/6 inhibitor Palbociclib can only bind to CDK4 monomers (or  
84 potentially also Cyclin D:CDK4 dimers) but not to Cyclin D:CDK4:p21/p27 trimers  
85 (Guiley et al., 2019). In this model, cell cycle arrest occurs through inhibition of CDK2  
86 activity by redistribution of p21 and p27 from CDK4 to CDK2 complexes (Guiley et al.,  
87 2019). Indeed, resistance to CDK4/6 inhibitors is linked to amplification of Cyclin E  
88 and CDK6 which may enable continued proliferation through increased CDK2 activity  
89 (Álvarez-Fernández & Malumbres, 2020; Rubin et al., 2020). Increased CDK2 activity  
90 has also been reported to result from increased Cyclin D expression, which sequesters  
91 p21 and p27 away from CDK2 (Vilgelm et al., 2019). This lack of CDK2 inhibition is  
92 proposed to drive proliferation in CDK4/6 inhibitor-treated cells.

93  
94 CDK4/6 inhibitors are able to arrest cells in G1 despite continued mitogen stimulation  
95 (Trotter & Hagan, 2020), indicating that p21 is the most likely candidate for mediating

96 an indirect inhibition of CDK2. Mitogen stimulation results in the abrogation of the  
97 inhibitory activity of p27 towards CDK4 due to phosphorylation of the Y74 residue by  
98 non-receptor tyrosine kinases (NRTK) such as Src (Chu et al., 2007; Grimmier et al.,  
99 2007; Guiley et al., 2019; Hume et al., 2020; Tsytlonok et al., 2019). Further, NRTK  
100 signalling can also result in Y88 phosphorylation of p27, which ejects the inhibitory 3<sub>10</sub>  
101 helix of p27 from the CDK2 active site, partially restoring CDK2 activity (Grimmier et  
102 al., 2007). Tyrosine phosphorylation of the 3<sub>10</sub> helix of p21 does not appear to lead to  
103 helix ejection, which would allow p21 to retain its function as a CDK inhibitor despite  
104 mitogen signalling, which is vital for a robust DNA damage response (Barr et al., 2017;  
105 Swadling et al., 2021).

106

107 The difference between the two models of CDK4/6 inhibitor action on cell cycle arrest  
108 is their dependence on p21 and p27 (Figure 1a). To investigate whether CDK4/6  
109 inhibitors require p21 and p27 to enter or maintain a G1 arrest in cells, we have  
110 characterised the expression of p21 and p27 in hTert-RPE1 cells, generated new cell  
111 line models to manipulate p21 expression and used live cell imaging to monitor cell  
112 cycle arrest in response to Palbociclib. We find that Palbociclib is able to initiate and  
113 maintain cell cycle arrest, even when p21 and p27 are removed. Our data call into  
114 question the importance of the indirect model of CDK4/6 inhibitor action and suggest  
115 that direct inhibition of CDK4/6 by Palbociclib can be sufficient to inhibit proliferation  
116 and maintain cell cycle arrest, at least in a non-transformed cellular context.

## 117 **Results**

118

### 119 **p21, and not p27, is enriched in the nuclei of cycling hTert-RPE1 cells**

120 For this study we used telomerase-immortalised hTERT-RPE1 cells (RPE1) as they  
121 are near diploid, non-transformed, have intact cell cycle control pathways and are  
122 sensitive to CDK4/6 inhibitors (Bodnar et al., 1998; Trotter & Hagan, 2020). As such,  
123 we assume that cell cycle regulatory complexes will be present at the correct  
124 stoichiometries. Previous studies investigating the mechanism of action of CDK4/6  
125 inhibitors have used cancer cells, where the extent to which cell cycle control networks  
126 are perturbed is poorly understood. We reasoned that by studying CDK4/6 inhibitor  
127 action in RPE1 cells, we could establish a baseline of how Palbociclib modulates a  
128 well-controlled cell cycle, which, in the future, can be used to understand the effects  
129 of mutations and perturbations observed in cancer cells. We focus on Palbociclib here  
130 as it is the best characterised in terms of both its mechanism and its effect on RPE1  
131 cells (Guiley et al., 2019; Trotter & Hagan, 2020).

132

133 Whilst RPE1 cells do have reported mutations in CDKN2A and KRAS, there is no clear  
134 link between KRAS mutations and Palbociclib sensitivity (di Nicolantonio et al., 2008;  
135 Libouban et al., 2017). We confirmed the expression of p16 protein in our RPE1 cells  
136 by western blot, indicating that it is not the loss of p16 protein which causes Palbociclib  
137 sensitivity in these cells and that cells with functional p16 can still be sensitive (Figure  
138 1b) (Wiedemeyer et al., 2010; Young et al., 2014).

139

140 We first characterised the protein expression and localisation of Cip/Kip CDK inhibitor  
141 proteins which have been implicated in the response to Palbociclib. Quantification of  
142 p21 and p27 levels by immunofluorescence in cycling RPE1 cells, plated at a low  
143 density, revealed that p21 protein is exclusively nuclear and is expressed  
144 heterogeneously (as previously shown, Barr et al., 2017; Figure 1c). p27 has low  
145 nuclear expression in cycling RPE1 cells, and its nuclear levels only increase as cells  
146 enter quiescence, as observed when cells are plated at high density and start to enter  
147 quiescence through contact inhibition (Figure 1c). This, together with previous data  
148 indicating that p21 and Cyclin D levels are correlated in cycling cells (Chen et al., 2013;  
149 Labaer et al., 1997; Yang et al., 2017), and that p27 would be largely tyrosine  
150 phosphorylated and degraded in growth-factor stimulated cells (Chu et al., 2007;

151 Grimmler et al., 2007; Swadling et al., 2021), suggests that p21, and not p27, is likely  
152 to be the primary regulator of Cyclin D:CDK4/6 activity in cycling RPE1 cells. We  
153 therefore focussed the majority of our efforts on investigating the role of p21 in the cell  
154 cycle response to Palbociclib. However, since the contribution of p27 cannot be  
155 discounted, we also perform our assays in the presence and absence of p27.

156

### 157 **Palbociclib is only effective as a cell cycle inhibitor during G1 in RPE1 cells**

158 As it has been established that Palbociclib is limited in its actions to G1 phase (Rubin  
159 et al., 2020), we asked when RPE1 cells are sensitive to Palbociclib during the cell  
160 cycle with respect to cell cycle arrest. We imaged asynchronous RPE1 cells following  
161 Palbociclib addition and followed their cell cycle progression using endogenously  
162 tagged mRuby-PCNA (Zerjatke et al., 2017; Supplementary Movie 1). We observed  
163 that cells in G1 phase of the cell cycle at the point of drug addition arrest immediately,  
164 whilst cells in S, G2 or mitosis complete their current cycle and re-enter G1 phase  
165 before arresting (Figure 1d). A small fraction of G1 cells (14.3%) do enter S-phase in  
166 the presence of Palbociclib and complete the current cycle before arresting in the next  
167 G1. All of these cells enter S-phase within 2 hours of Palbociclib addition and likely  
168 represent late G1 cells that were close to the G1/S transition at the time of drug  
169 addition. Thus, Palbociclib can only induce cell cycle arrest in cells which are in  
170 early/mid G1 phase.

171

### 172 **p21 and p27 are not required for entry into G1 arrest with Palbociclib in RPE1** 173 **cells**

174 We hypothesised two possible mechanisms for a G1 arrest response to Palbociclib.  
175 One, that consistent with a direct model of Palbociclib action, CDK4/6 activity is only  
176 essential for cell cycle progression during early and mid G1 phase of the cell cycle. In  
177 this case, whilst CDK4/6 may be inhibited by Palbociclib during the whole cell cycle,  
178 this does not affect progression until G1. Alternatively, this could be explained by the  
179 indirect model (Figure 1a) as p21 is degraded abruptly at S-phase entry (Barr et al.,  
180 2017; Bornstein et al., 2003; Heldt et al., 2018; Nathans et al., 2021) and is therefore  
181 only present at high levels during G1 (Rubin et al. 2020).

182

183 To test this indirect model of Palbociclib action and determine if cell cycle arrest  
184 induced by CDK4/6 inhibitors is dependent upon p21 and p27, we assayed cell cycle

185 distribution by immunofluorescence in fixed cells following 48 h treatment with  
186 Palbociclib, in the presence and absence of p21 and p27. We measured EdU  
187 incorporation, phospho-S807/811 Rb (P-Rb) levels and DNA content. Cells were pulse  
188 labelled with the nucleotide analogue 5-ethynyl-2'-deoxyuridine (EdU) 30 minutes  
189 before fixation and Click-iT chemistry used to assay the proportion of cells in S phase  
190 (see Methods, Supplementary Figure 2a). Whilst EdU incorporation enabled us to  
191 assess the percentage of cells in S phase, P-Rb and Hoechst staining was used to  
192 determine cell cycle phase distribution more specifically. Quantification of DNA  
193 content by Hoechst sum intensity allows the gating of cells into G1, S and G2/M  
194 phases (Supplementary Figure 2b; Chung et al. 2019). P-Rb is bimodally distributed  
195 in a population of asynchronously cycling cells, reflecting the proliferation status of the  
196 population with G0 cells (and Palbociclib arrested cells) displaying  
197 hypophosphorylated Rb (Stallaert et al. 2021, Crozier et al. 2021, Spencer et al. 2013)  
198 (Supplementary Figures 2c).

199

200 Assessing the cell cycle distribution of untreated p21 knockout (KO) cells (Barr et al.,  
201 2017) showed that p21KO does not appreciably alter the fraction of cells in G1 or S  
202 phase (Figure 2a columns 1 vs 5), and reduces the fraction of cells with  
203 hypophosphorylated Rb compared to p21 wild-type (WT) cells (Supplementary Figure  
204 2d). Assaying the proliferative status of p21KO cells following Palbociclib treatment  
205 revealed an arrest in G1 to the same extent as for p21WT cells (Figure 2a columns 2  
206 vs 6, Supplementary Figure 2d).

207

208 Whilst we hypothesised that p21 would be more likely than p27 to mediate an indirect  
209 mechanism of G1 arrest in Palbociclib in RPE1 cells (Figure 1c), we wanted to ask if  
210 Palbociclib could induce arrest in the absence of both CIP/KIP proteins, as p27 has  
211 also been implicated in this mechanism (Guiley et al., 2019; Polyak et al., 1994; Sherr  
212 & Roberts, 1999). siRNA-mediated knockdown of p27 prior to Palbociclib treatment  
213 did not affect proliferation (Figure 2a columns 1 vs 3 and 5 vs 7) or the ability of cells  
214 to arrest in G1 (columns 2 vs 4 and 6 vs 8) in p21WT or p21KO backgrounds at a  
215 range of Palbociclib concentrations (Figure 2b, Supplementary Figure 2e, f).

216

217 Our fixed cell analyses indicated that RPE1 cells arrest in G1 in response to  
218 Palbociclib in the absence of p21 and/or p27. However, we wanted to test the

219 hypothesis that it is the presence of p21 (and perhaps p27) during G1 that makes G1  
220 cells sensitive to Palbociclib (Rubin et al., 2020). We reasoned that, if this was the  
221 case, then in the absence of p21 and/or p27, a higher fraction of cells in G1 at the time  
222 of Palbociclib addition may progress through S-phase and complete the cycle, before  
223 arresting in the next G1. Therefore, we repeated our live-imaging experiment in  
224 mRuby-PCNA labelled p21WT and p21KO cells treated with non-targeting control  
225 (NTC) or p27 targeting siRNA (Barr et al., 2017; Zerjatke et al., 2017). We observed  
226 that cells respond in the same way to Palbociclib, arresting in G1, independent of the  
227 presence of p21 and p27 (Figure 2c; fraction of G1 cells progressing into S-phase:  
228 p21WT NTC 6.5%, p21WT p27si 0%, p21KO NTC 6.7%, p21KO p27si 6.1%).

229

230 Together, these data suggest that p21 and p27 are not essential for entry into a  
231 Palbociclib-mediated cell cycle arrest and that CDK4/6 activity is only required for cell  
232 cycle entry during early and mid G1.

233

### 234 **Generating p21-degron cell lines**

235 In our previous experiments, the absence of p21 and p27 in RPE1 cells at the time of  
236 Palbociclib addition means that Palbociclib can bind directly to CDK4 and CDK6 to  
237 inhibit their activity (Guiley et al., 2019) and that Palbociclib can only act to arrest the  
238 cell cycle through a direct CDK4/6 inhibition mechanism. However, this does not  
239 address the question of whether, when present, p21 and p27 are required to mediate  
240 an indirect mechanism of cell cycle arrest?

241

242 One way to address this question is to allow cells to enter a Palbociclib-mediated  
243 arrest in the presence of p21 and p27, and then remove the Cip/Kips and see if any  
244 cells re-enter the cell cycle. To be able to efficiently and inducibly degrade p21, we  
245 used a double degron system (Hégarat et al., 2020). In this way, we could test if p21  
246 is needed for maintaining a Palbociclib-induced arrest in a system where p21 is  
247 normally present to promote the assembly of functional Cyclin D:CDK4/6 complexes,  
248 and where p21 could potentially localise upon Palbociclib addition to Cyclin:CDK2  
249 complexes to mediate cell cycle arrest (Figure 1a). We introduced an mVenus-mAID-  
250 SMASh tag at the C-terminus of p21 in RPE1 cells expressing myc-OstTIR1 under a  
251 doxycycline-inducible promoter (p21-degron cells). Homozygous gene targeting was  
252 confirmed by PCR and western blot, and an siRNA directed against p21 was used to



253 confirm specificity of tagging (Figure 3a, Supplementary Figure 3a, c). We verified that  
254 addition of DIA (doxycycline, IAA and ASV) resulted in the depletion of p21 to  
255 undetectable levels by immunoblot after 24 h and that the tag did not affect cell growth  
256 and p21 protein localised normally to the nucleus (Figure 3a, Supplementary Figure  
257 3b-d).

258

259 We first used the p21-degron cells to ask if acute depletion of p21 and/or p27  
260 abrogates Palbociclib-induced cell cycle arrest in a system where p21 is normally  
261 present to stabilise assembly of Cyclin D:CDK4/6 complexes (in contrast to the p21KO  
262 cells which may also have adapted to the loss of p21). Cells were reverse transfected  
263 with siRNA, to deplete p27, and treated with DIA, to degrade p21, then treated with  
264 Palbociclib 24 h later for 48 h. EdU incorporation, Hoechst and P-Rb staining were  
265 used to assess if (and at what cell cycle phase) cells were arrested. Degradation of  
266 p21 did not significantly affect the percentage of EdU positive cells, the percentage of  
267 G1 phase cells or the distribution of P-Rb staining in DMSO and siNTC treated cells  
268 (Figure 3b column 1 vs 3, Supplementary Figure 3e). p21 degradation also did not  
269 affect entry into cell cycle arrest mediated by Palbociclib (Figure 3b, column 2 vs 4,  
270 Supplementary Figure 3e). Following p27 knockdown alone, proliferation was largely  
271 unaffected, similar to what we observed in p21WT and p21KO cells (Figure 3b,  
272 columns 1 vs 5, Supplementary Figure 3e). p27 knockdown also did not affect entry  
273 into cell cycle arrest in Palbociclib, independently of DIA addition prior to treatment  
274 (Figure 3b columns 2 vs 6 and 4 vs 8, Supplementary Figure 3e).

275

276 In summary, neither p21 nor p27 are necessary for the initiation of a Palbociclib-  
277 mediated arrest in RPE1 cells.

278

### 279 **p21 and p27 are not required for maintenance of G1 arrest with Palbociclib**

280 To further clarify the importance of direct or indirect mechanisms of Palbociclib action  
281 in our system, we wanted to ask if maintenance of cell cycle arrest initiated in  
282 unperturbed conditions is dependent on p21 and p27. We reasoned that if an indirect  
283 mechanism maintains cell cycle arrest during Palbociclib treatment then a decrease  
284 in p21 or p27 protein levels during arrest would result in cell cycle re-entry.

285

286 To test if removal of p21 and/or p27 promoted cell cycle re-entry in Palbociclib-arrested  
287 cells, we first degraded p21 following 24 h Palbociclib treatment in p21-degron cells.  
288 Assaying proliferation as before, we saw that cell cycle arrest was maintained following  
289 p21 degradation (Figure 4a columns 5 vs 6, Supplementary Figure 4a). Further, p27  
290 knockdown following Palbociclib treatment did not affect the arrest, independent of the  
291 presence of p21 (Figure 4a columns 7 vs 8, Supplementary Figure 4a). Additionally,  
292 in Palbociclib treated p21KO cells, the knockdown of p27 did not affect the arrest  
293 (Figure 4b columns 7 vs 8, Supplementary Figure 4b).

294

295 We observed that Palbociclib treatment induces an increase in p21 and p27 protein  
296 levels in cells in a time-dependent manner, and that p21 localisation remains  
297 exclusively nuclear. The largest increase in p21 protein occurs between 48 and 72 h  
298 Palbociclib treatment (p21: Figure 4c; p27: Supplementary Figure 2d columns 1 vs 2).  
299 We hypothesised that this might reflect an increased dependence on p21 and p27 to  
300 maintain cell cycle arrest in the presence of Palbociclib. To test this, we decreased  
301 p21 and p27 protein levels following a long-term Palbociclib-mediated arrest, to ask if  
302 these proteins are necessary to maintain a prolonged arrest initiated in unperturbed  
303 conditions. We used p21-degron cells to degrade p21 72 h following Palbociclib  
304 treatment. Assaying proliferation 48 h following the induction of p21 degradation  
305 revealed a similar extent of arrest, independent of the presence of p21 (Figure 4d  
306 columns 5 vs 6, Supplementary Figure 4c) or p27 (columns 5 vs 7 and 7 vs 8).

307

308 Together, our data demonstrate that RPE1 cells are not dependent on p21 or p27 for  
309 maintenance of a Palbociclib-mediated cell cycle arrest.

## 310 Discussion

311 In this study, we have established that a Palbociclib-mediated cell cycle arrest is not  
312 dependent on the CIP/KIP inhibitor proteins p21 and p27 in RPE1 cells. Using this  
313 non-transformed cell line, we have demonstrated that cell cycle arrest in response to  
314 Palbociclib can both be initiated and maintained without p21 or p27.

315

316 Importantly, in a system in which a 'normal' Palbociclib-mediated arrest has been  
317 allowed to occur, the presence of p21 and p27 is not necessary for the maintenance  
318 of cell cycle arrest (Figure 4). This indicates that an arrest initiated in the presence of  
319 Cyclin D:CDK4/6 trimeric complexes with p21 (and potentially p27), which might be  
320 predicted to occur through an indirect mechanism of action of Palbociclib, is not  
321 dependent on p21/p27. If the arrest were maintained through the indirect inhibition of  
322 CDK2, we would predict that the absence of p21/p27 would result in the release of, at  
323 least a fraction of, cells into the cell cycle despite the continued presence of  
324 Palbociclib. Whilst we are unable to rule out that in the presence of p21 and p27,  
325 Palbociclib acts through an indirect mechanism to inhibit CDK2 to initiate arrest that is  
326 then maintained by direct Palbociclib-mediated CDK4/6 inhibition, our data suggests  
327 that the presence of p21 and/or p27 is not essential for entry into cell cycle arrest or  
328 maintenance of that arrest in a non-transformed cell line.

329

330 This calls into question a solely indirect model of Palbociclib driven cell cycle arrest,  
331 which is dependent upon the presence of p21 and/or p27 both before and during the  
332 arrest (model 2, Fig 1A). Our data support the direct inhibition of CDK4/6 by Palbociclib  
333 to inhibit proliferation. This is supported by work assaying CDK4/6 and CDK2 activity  
334 in single non-transformed MCF10A cells using live cell CDK4/6 and CDK2 activity  
335 reporters (Yang et al., 2020). In both G1 and S phase cells released from  
336 synchronisation in G0, Palbociclib addition decreases CDK4/6 activity within one hour,  
337 while CDK2 activity decreases at a much slower rate. Further, recent data from  
338 multiple cell line models suggested that in contrast to CDK2, CDK4 catalytic activity  
339 towards Rb is inhibited by Palbociclib treatment (Simoneschi et al., 2021). Together,  
340 this suggests that Palbociclib directly inhibits CDK4/6 catalytic activity and that this is  
341 sufficient for a G1 phase arrest.

342

343 Whilst sensitivity to Palbociclib is known to be restricted to G1, here we have reported  
344 that cells become insensitive to drug addition in late G1, at approximately two hours  
345 before S phase entry (Figure 1d). This corresponds with early reports of restriction  
346 point timing (Campisi et al., 1982; Foster et al., 2010; Yen & Pardee, 1978). This could  
347 reflect an increasing rate of p21 degradation as cells approach the G1/S transition  
348 (Heldt et al., 2018; Nathans et al., 2021) or could be the result of a change in the  
349 dependency of cells on CDK4/6 activity for cell cycle progression at the restriction  
350 point. Since we see no change in sensitivity of G1 cells to Palbociclib in the absence  
351 of p21 and/or p27, it is likely that it is the latter hypothesis that is correct here and that  
352 cells only require CDK4/6 activity in early and mid G1 to complete the cell cycle.

353

354 Interestingly, p21 has been implicated in cellular resistance mechanisms to CDK4/6  
355 inhibitors, indicating it still has an important role in their mechanism of action in some  
356 contexts. The loss of p53, a major driver of p21 expression, has been implicated in  
357 resistance to the CDK4/6 inhibitor Abemaciclib, with a significant enrichment in *TP53*  
358 mutations in resistant breast cancer (Patnaik et al., 2016; Wander et al., 2020).  
359 Further, increasing p21 expression is linked to re-sensitising resistant cells to  
360 Palbociclib, indicating that low p21 levels may contribute to Palbociclib resistance  
361 (AbuHammad et al., 2019; Vilgelm et al., 2019). However, loss of p53 does not prevent  
362 proliferative arrest induced by CDK4/6 inhibitors, supporting our hypothesis that  
363 CDK4/6 inhibitors are able to act through multiple potential mechanisms (Wander et  
364 al., 2020). In contrast, Y88 phosphorylation of p27, a modification which prevents its  
365 inhibitory activity towards CDK2, correlates with sensitivity to Palbociclib (Gottesman  
366 et al., 2019).

367

368 Our data does not rule out a potential role for p21/p27 during Palbociclib-induced cell  
369 cycle arrest in some cells (Guiley et al., 2019). Indeed, it indicates that Palbociclib is  
370 able to arrest the cell cycle through parallel direct and indirect mechanisms and that  
371 the dominant mechanism depends upon the cellular context. A parallel pathways  
372 model explains how both RPE1 cells acutely depleted of p21/p27 and cells with  
373 impaired CDK4/6 or Rb activity are sensitive to Palbociclib (Guiley et al., 2019; Schade  
374 et al., 2019; Zhao & Burgess, 2019).

375

376 This could represent a difference between healthy and cancer cells in their  
377 dependence on CIP/KIP proteins for arrest. Whilst MCF7 breast cancer cells are at  
378 least partly dependent on CDK4/6 activity for cell cycle entry (Grillo et al., 2006),  
379 p21/p27 appear to mediate their Palbociclib sensitivity (Guiley et al., 2019). It therefore  
380 seems likely that Palbociclib is able to arrest cell cycle progression through both direct  
381 and indirect mechanisms, meaning the sensitivity of a cancer cell to Palbociclib may  
382 be dependent upon both its reliance on CDK4/6 activity for cell cycle entry and the  
383 relative expression levels of p21/p27. As the activity of these pathways is often  
384 perturbed in cancer, this may alter the effect of Palbociclib on the cell cycle,  
385 determining a cell's sensitivity to Palbociclib and the mechanism by which it may cause  
386 cell cycle arrest. For example, the lack of sensitivity of some triple-negative breast  
387 cancer cells (TNBC) may reflect both a decreased dependence on CDK4/6 activity for  
388 cell cycle entry (due to high Cyclin E expression and CDK2 activity) and low p21 and/or  
389 p27 levels (Asghar et al., 2017). The prediction of a cell's sensitivity to Palbociclib may  
390 therefore require information about the balance between the activity of multiple cell  
391 cycle pathways (Table 1). For example, we would predict that in Rb-deficient cells  
392 which remain sensitive to Palbociclib would be sensitive to decreases in p21/p27.  
393 These different potential mechanisms of action of Palbociclib may explain why there  
394 are no clear biomarkers for sensitivity.

395

#### 396 **Authors' contributions**

397 A.R.B. conceived the study. A.R.B and B.R.P. designed, performed and analysed the  
398 experiments and wrote the manuscript.

399

#### 400 **Acknowledgements**

401 We would like to thank Adrian Saurin and Tony Ly for critical reading and discussion  
402 of the manuscript. We also thank the LMS/NIHR Imperial Biomedical Research Centre  
403 Flow Cytometry Facility for the support. BRP and ARB are funded by CRUK CDF:  
404 C63833/A25729 and MRC core funding to the London Institute of Medical Sciences  
405 (MC-A658-5TY60).

## 406 **Methods**

### 407 **Cell culture**

408 hTert-RPE1 cells were from ATCC and were maintained in DMEM (Gibco)  
409 supplemented with 10% FBS and 1% Penicillin-Streptomycin at 37°C and 5% CO<sub>2</sub>.  
410 RPE1 mRuby-PCNA p21-GFP cells, in which both alleles of the endogenous CDKN1A  
411 locus were labelled with GFP at the C-terminus and one allele of PCNA was labelled  
412 at the N-Terminus with mRuby, were described previously (Barr et al., 2017). RPE1  
413 mRuby-PCNA p21 KO 1A cells were described previously (Barr et al., 2017).

414

415 Drugs used and working concentrations: Etoposide 10 µM, Doxycycline 1 µg/ml,  
416 Indole-3-acetic acid (IAA) 500 µM, Asunaprevir (ASV) 3 µM, Palbociclib 1 µM (unless  
417 otherwise stated).

418

### 419 **Generation of p21-Venus-AID-SMASH tagged hTert-RPE1 cell line**

420 An mVenus-mAID-SMASH tag was introduced to the C terminus of the human  
421 CDKN1A gene using targeting vectors and gRNA/Cas9 cleavage.

422 For the homology donor plasmid primers used for the left and right homology arms  
423 were the same as in Barr et al. 2017. To PCR amplify mVenus, we used the following  
424 primers: forward, 5'-

425 TCTTCTCCAAGAGGAAGCCCGGAGGAGGTGAGCAAGGGCGAGGAG-3',

426 reverse 5'-GCTGATGCCGCTGAGGCGCCCTTGTACAGCTCGTCCAT-3'. mAID-

427 SMASH-Neomycin was amplified with the primers forward: 5'-

428 GGCGCCTCAGCGGCATCAGCTGCAGGAGCTGGAGGTGCATC-3' and reverse: 5'-

429 GCAGGCTTCTGTGGGCGGATCAGAAGAACTCGTCAAGAAG-3'. LHA, mVenus,

430 mAID-SMASH-Neomycin, RHA PCR products were ligated into pAAV p21 vector by

431 Gibson assembly at a ratio vector:inserts of 1:2:2 using T4 DNA ligase (NEB). All

432 constructs were checked by sequencing before transfection into cells. To generate

433 stable clones, hTERT-RPE1 OsTIR1 cells (a gift from Helfrid Hoechegger, Hégarat et

434 al., 2020) were transfected with pX330 g21 gRNA plasmid (Barr et al., 2017) and the

435 p21 homology donor plasmid at a ratio of 1:1 using Lipofectamine 2000, according to

436 the manufacturer's instructions (Invitrogen). Cells were incubated for 3 weeks in media

437 containing 0.5 µg/ml G418 and selected clones were screened by western blot and

438 genomic DNA PCR.

439 **siRNA transfection**

440 Cells were transfected with siRNA at a final concentration of 20 nM using  
441 Lipofectamine RNAiMAX, according to the manufacturer's instructions (Invitrogen).  
442 Briefly, 40 nl of Lipofectamine RNAiMAX (Invitrogen) was mixed with siRNA in 10 µl  
443 OptiMEM (Gibco) per well of a 384 well plate. 20 µl of cells at a density of  $2.5 \times 10^4$   
444 cells/ml were plated on top of this, and cells were incubated at 37 °C. siRNAs used  
445 were Dharmacon ON-TARGETplus Non-targeting siRNA #1 (NTC) and CDKN1A (set  
446 of 4), Ambion Silencer Select siRNA CDKN1B (Cat. No 4427038) and p16 siRNA  
447 sequence used: UACCGUAAAUGUCCAUUUUAUA.

448

449 **Immunofluorescence**

450 Cells were grown on 384 well CellCarrierUltra (PerkinElmer) plates. For EdU staining,  
451 a final concentration of 10 µM EdU was added to the growth media 30 minutes prior  
452 to fixation. Cells were fixed in 4% paraformaldehyde in PBS for 15 minutes, washed  
453 three times with PBS. Permeabilization in PBS 0.2% Triton X-100 for 15 minutes was  
454 followed by blocking in 2% BSA in PBS for 1 hour. Cells were incubated with primary  
455 antibodies diluted in blocking buffer at 4°C overnight, washed three times with PBS  
456 then incubated with a 1:1000 dilution of secondary antibodies for 1 hour at room  
457 temperature. For EdU detection cells were incubated for 30 minutes in TBS 100 mM  
458 pH 7.5, CuSO<sub>4</sub> 4mM, Sulfo-cyanine 3 azide 5 µM, sodium ascorbate 100 mM. Cells  
459 were washed three times in PBS, incubated for 10 minutes with 1 µg/ml Hoechst, then  
460 washed a further three times in PBS.

461

462 Antibodies used: p21 (Invitrogen MA5-14949 1:1000), p27 (CST 3688 1:1000), P-Rb  
463 S807/811 (CST 8516, 1:2000); secondary Goat anti-rabbit IgG (H+L) Alexa Fluor 647  
464 (Invitrogen A21245, 1:1000). Plates were imaged using a 20X (NA 0.8) objective using  
465 an Operetta CLS microscope.

466

467 **Western blot**

468 Whole cell extract of RPE1 cells was collected following aspiration of medium from  
469 culture plate, two washed in PBS and the addition of 1X Novex Tris-glycine SDS  
470 sample buffer (Invitrogen) and collection of cells by scraping. Samples were incubated  
471 at 95°C for 10 minutes before loading on 12-15% precast NuPAGE gels (Invitrogen).

472 Primary antibodies used: p16 (CST 80772, 1:1000), p21 (Invitrogen MA5-14949  
473 1:1000), vinculin (CST 13901 1:1000); secondary antibodies HRP linked Anti Rabbit  
474 IgG (CST 7074, 1:2000).

475

#### 476 **Growth curves**

477 Cells were plated at a density of 20,000 cells per well in duplicate in 6-well plates.  
478 Brightfield images were taken every 2 hours for 5 days and the percentage confluency  
479 calculated using an Incucyte Live-Cell analysis system (Sartorius).

480

#### 481 **Live imaging of Palbociclib addition**

482 hTert-RPE1 cells were seeded into 384 well CellCarrier Ultra plates (PerkinElmer) one  
483 day prior to imaging at a density of 1000 cells/well in 20  $\mu$ l of phenol-red free  
484 DMEM:F12 with 10% FBS and 1% P/S. In cases where cells were transfected with  
485 siRNA, cells were plated onto siRNA:lipofectamine RNAiMax (Invitrogen) complexes  
486 (as described elsewhere). Prior to imaging, media was added to all wells to a final  
487 volume of 100  $\mu$ l, with a final concentration of 1  $\mu$ M Palbociclib. A breathable film was  
488 applied to the plate (ThermoFisher) to prevent media evaporation and cells were  
489 imaged on the Operetta CLS (PerkinElmer) at 37 °C and 5% CO<sub>2</sub>, using a 20x (N.A.  
490 0.8) objective, every 10 (Figure 2) or 15 (Figure 1) mins. Image analysis was  
491 performed in FIJI and NucliTrack (Cooper et al., 2017). Endogenously tagged mRuby-  
492 PCNA was used, as previously described to determine cell cycle timing (Zerjatke et  
493 al., 2017).



- 494 AbuHammad, S., Cullinane, C., Martin, C., Bacolas, Z., Ward, T., Chen, H., Slater, A., Ardley, K.,  
495 Kirby, L., Chan, K. T., Brajanovski, N., Smith, L. K., Rao, A. D., Lelliott, E. J., Kleinschmidt,  
496 M., Vergara, I. A., Papenfuss, A. T., Lau, P., Ghosh, P., ... Sheppard, K. E. (2019). Regulation  
497 of PRMT5-MDM4 axis is critical in the response to CDK4/6 inhibitors in melanoma.  
498 *Proceedings of the National Academy of Sciences of the United States of America*,  
499 *116*(36), 17990–18000. <https://doi.org/10.1073/pnas.1901323116>
- 500 Álvarez-Fernández, M., & Malumbres, M. (2020). Mechanisms of Sensitivity and Resistance  
501 to CDK4/6 Inhibition. *Cancer Cell*, *37*(4), 514–529.  
502 <https://doi.org/10.1016/j.ccell.2020.03.010>
- 503 Asghar, U. S., Barr, A. R., Cutts, R., Beaney, M., Babina, I., Sampath, D., Giltneane, J., Lacap, J.  
504 A., Crocker, L., Young, A., Pearson, A., Herrera-Abreu, M. T., Bakal, C., & Turner, N. C.  
505 (2017). Single-cell dynamics determines response to CDK4/6 inhibition in triple-negative  
506 breast cancer. *Clinical Cancer Research*, *23*(18), 5561–5572.  
507 <https://doi.org/10.1158/1078-0432.CCR-17-0369>
- 508 Barr, A. R., Cooper, S., Heldt, F. S., Butera, F., Stoy, H., Mansfeld, J., Novák, B., & Bakal, C.  
509 (2017). DNA damage during S-phase mediates the proliferation-quiescence decision in  
510 the subsequent G1 via p21 expression. *Nature Communications*, *8*, 14728.  
511 <https://doi.org/10.1038/ncomms14728>
- 512 Bodnar, A. G., Ouellette, M., Frolkis, M., Holt, S. E., Chiu, C. P., Morin, G. B., Harley, C. B., Shay,  
513 J. W., Lichtsteiner, S., & Wright, W. E. (1998). Extension of life-span by introduction of  
514 telomerase into normal human cells. *Science*, *279*(5349), 349–352.  
515 <https://doi.org/10.1126/science.279.5349.349>
- 516 Bornstein, G., Bloom, J., Sitry-Shevah, D., Nakayama, K., Pagano, M., & Hershko, A. (2003).  
517 Role of the SCFSkp2 ubiquitin ligase in the degradation of p21Cip1 in S phase. *Journal of*  
518 *Biological Chemistry*, *278*(28), 25752–25757. <https://doi.org/10.1074/jbc.M301774200>
- 519 Caillot, M., Bourgeais, J., Dakik, H., Costé, Mazure, N. M., Lelièvre, Coqueret, O., Hérault, O.,  
520 Mazurier, F., & Sola, B. (2020). Cyclin D1 targets hexokinase 2 to control aerobic  
521 glycolysis in myeloma cells. *Oncogenesis*, *9*(7). [https://doi.org/10.1038/s41389-020-](https://doi.org/10.1038/s41389-020-00253-3)  
522 [00253-3](https://doi.org/10.1038/s41389-020-00253-3)
- 523 Campisi, J., Medrano, E. E., Morreo, G., & Pardee, A. B. (1982). Restriction point control of cell  
524 growth by a labile protein: evidence for increased stability in transformed cells.  
525 *Proceedings of the National Academy of Sciences of the United States of America*, *79*(2),  
526 436–440. <https://doi.org/10.1073/pnas.79.2.436>
- 527 Chen, J.-Y., Lin, J.-R., Tsai, F.-C., & Meyer, T. (2013). Dosage of Dyrk1a Shifts Cells within a p21-  
528 Cyclin D1 Signaling Map to Control the Decision to Enter the Cell Cycle. *Molecular Cell*,  
529 *52*(1), 87–100. <https://doi.org/10.1016/J.MOLCEL.2013.09.009>
- 530 Cheng, M., Olivier, P., Diehl, J. A., Fero, M., Roussel, M. F., Roberts, J. M., & Sherr, C. J. (1999).  
531 The p21(Cip1) and p27(Kip1) CDK “inhibitors” are essential activators of cyclin D-  
532 dependent kinases in murine fibroblasts. *The EMBO Journal*, *18*(6), 1571–1583.  
533 <https://doi.org/10.1093/emboj/18.6.1571>
- 534 Chu, I., Sun, J., Arnaout, A., Kahn, H., Hanna, W., Narod, S., Sun, P., Tan, C. K., Hengst, L., &  
535 Slingerland, J. (2007). p27 Phosphorylation by Src Regulates Inhibition of Cyclin E-Cdk2.  
536 *Cell*, *128*(2), 281–294. <https://doi.org/10.1016/j.cell.2006.11.049>
- 537 Chung, M., Liu, C., Yang, H. W., Köberlin, M. S., Cappell, S. D., & Meyer, T. (2019). Transient  
538 Hysteresis in CDK4/6 Activity Underlies Passage of the Restriction Point in G1. *Molecular*  
539 *Cell*, *0*(0). <https://doi.org/10.1016/j.molcel.2019.08.020>

- 540 Cooper, S., Barr, A. R., Glen, R., & Bakal, C. (2017). NucliTrack: an integrated nuclei tracking  
541 application. *Bioinformatics*. <https://doi.org/10.1093/bioinformatics/btx404>
- 542 di Nicolantonio, F., Arena, S., Gallicchio, M., Zecchin, D., Martini, M., Flonta, S. E., Stella, G.  
543 M., Lamba, S., Cancelliere, C., Russo, M., Geuna, M., Appendino, G., Fantozzi, R., Medico,  
544 E., & Bardelli, A. (2008). Replacement of normal with mutant alleles in the genome of  
545 normal human cells unveils mutation-specific drug responses. *Proceedings of the*  
546 *National Academy of Sciences of the United States of America*, *105*(52), 20864–20869.  
547 <https://doi.org/10.1073/pnas.0808757105>
- 548 Dickler, M. N., Tolaney, S. M., Rugo, H. S., Cortes, J., Dieras, V., Patt, D., Wildiers, H., Hudis, C.  
549 A., O’Shaughnessy, J., Zamora, E., Yardley, D. A., Frenzel, M., Koustenis, A., & Baselga, J.  
550 (2017). MONARCH 1, a phase II study of abemaciclib, a CDK4 and CDK6 inhibitor, as a  
551 single agent, in patients with refractory HR+/HER2- metastatic breast cancer. *Clinical*  
552 *Cancer Research*, *23*(17), 5218–5224. <https://doi.org/10.1158/1078-0432.CCR-17-0754>
- 553 Finn, R. S., Martin, M., Rugo, H. S., Jones, S., Im, S.-A., Gelmon, K., Harbeck, N., Lipatov, O. N.,  
554 Walshe, J. M., Moulder, S., Gauthier, E., Lu, D. R., Randolph, S., Diéras, V., & Slamon, D.  
555 J. (2016). Palbociclib and Letrozole in Advanced Breast Cancer. *New England Journal of*  
556 *Medicine*, *375*(20), 1925–1936. <https://doi.org/10.1056/NEJMoa1607303>
- 557 Foster, D. A., Yellen, P., Xu, L., & Saqena, M. (2010). Regulation of G1 Cell Cycle Progression:  
558 Distinguishing the Restriction Point from a Nutrient-Sensing Cell Growth Checkpoint(s).  
559 *Genes & Cancer*, *1*(11), 1124–1131. <https://doi.org/10.1177/1947601910392989>
- 560 Fry, D. W., Harvey, P. J., Keller, P. R., Elliott, W. L., Meade, M. A., Trachet, E., Albassam, M.,  
561 Zheng, X. X., Leopold, W. R., Pryer, N. K., & Toogood, P. L. (2004). Specific inhibition of  
562 cyclin-dependent kinase 4/6 by PD 0332991 and associated antitumor activity in human  
563 tumor xenografts. *Molecular Cancer Therapeutics*, *3*(11), 1427–1437.
- 564 Gelbert, L. M., Cai, S., Lin, X., Sanchez-Martinez, C., Prado, M. del, Lallena, M. J., Torres, R.,  
565 Ajamie, R. T., Wishart, G. N., Flack, R. S., Neubauer, B. L., Young, J., Chan, E. M., Iversen,  
566 P., Cronier, D., Kreklau, E., & de Dios, A. (2014). Preclinical characterization of the CDK4/6  
567 inhibitor LY2835219: In-vivo cell cycle-dependent/independent anti-tumor activities  
568 alone/in combination with gemcitabine. *Investigational New Drugs*, *32*(5), 825–837.  
569 <https://doi.org/10.1007/s10637-014-0120-7>
- 570 Gottesman, S. R. S., Somma, J., Tshiperson, V., Dresner, L., Govindarajulu, U., Patel, P., & Blain,  
571 S. W. (2019). Tyrosine phosphorylation of p27KIP1 correlates with palbociclib  
572 responsiveness in breast cancer tumor cells grown in explant culture. *Molecular Cancer*  
573 *Research*, *17*(3), 669–675. <https://doi.org/10.1158/1541-7786.MCR-18-0188>
- 574 Grillo, M., Bott, M. J., Khandke, N., McGinnis, J. P., Miranda, M., Meyyappan, M., Rosfjord, E.  
575 C., & Rabindran, S. K. (2006). Validation of cyclin D1/CDK4 as an anticancer drug target  
576 in MCF-7 breast cancer cells: Effect of regulated overexpression of cyclin D1 and siRNA-  
577 mediated inhibition of endogenous cyclin D1 and CDK4 expression. *Breast Cancer*  
578 *Research and Treatment*, *95*(2), 185–194. <https://doi.org/10.1007/s10549-005-9066-y>
- 579 Grimmler, M., Wang, Y., Mund, T., Cilenšek, Z., Keidel, E. M., Waddell, M. B., Jäkel, H.,  
580 Kullmann, M., Kriwacki, R. W., & Hengst, L. (2007). Cdk-Inhibitory Activity and Stability  
581 of p27Kip1 Are Directly Regulated by Oncogenic Tyrosine Kinases. *Cell*, *128*(2), 269–280.  
582 <https://doi.org/10.1016/j.cell.2006.11.047>
- 583 Guiley, K. Z., Stevenson, J. W., Lou, K., Barkovich, K. J., Kumarasamy, V., Wijeratne, T. U.,  
584 Bunch, K. L., Tripathi, S., Knudsen, E. S., Witkiewicz, A. K., Shokat, K. M., & Rubin, S. M.  
585 (2019). p27 allosterically activates cyclin-dependent kinase 4 and antagonizes palbociclib  
586 inhibition. *Science*, *366*(6471). <https://doi.org/10.1126/SCIENCE.AAW2106>

- 587 Harbour, J. W., Luo, R. X., Dei Santi, A., Postigo, A. A., & Dean, D. C. (1999). Cdk  
588 phosphorylation triggers sequential intramolecular interactions that progressively block  
589 Rb functions as cells move through G1. *Cell*, *98*(6), 859–869.  
590 [https://doi.org/10.1016/S0092-8674\(00\)81519-6](https://doi.org/10.1016/S0092-8674(00)81519-6)
- 591 Hégarat, N., Crncec, A., Suarez Peredo Rodriguez, M. F., Echegaray Iturra, F., Gu, Y., Busby, O.,  
592 Lang, P. F., Barr, A. R., Bakal, C., Kanemaki, M. T., Lamond, A. I., Novak, B., Ly, T., &  
593 Hochegger, H. (2020). Cyclin A triggers Mitosis either via the Greatwall kinase pathway  
594 or Cyclin B. *The EMBO Journal*, *39*(11). <https://doi.org/10.15252/embj.2020104419>
- 595 Heldt, F. S., Barr, A. R., Cooper, S., Bakal, C., & Novák, B. (2018). A comprehensive model for  
596 the proliferation-quiescence decision in response to endogenous DNA damage in human  
597 cells. *Proceedings of the National Academy of Sciences of the United States of America*,  
598 *201715345*. <https://doi.org/10.1073/pnas.1715345115>
- 599 Hortobagyi, G. N., Stemmer, S. M., Burris, H. A., Yap, Y.-S., Sonke, G. S., Paluch-Shimon, S.,  
600 Campone, M., Blackwell, K. L., André, F., Winer, E. P., Janni, W., Verma, S., Conte, P.,  
601 Arteaga, C. L., Cameron, D. A., Petrakova, K., Hart, L. L., Villanueva, C., Chan, A., ...  
602 O’Shaughnessy, J. (2016). Ribociclib as First-Line Therapy for HR-Positive, Advanced  
603 Breast Cancer. *New England Journal of Medicine*, *375*(18), 1738–1748.  
604 <https://doi.org/10.1056/NEJMoa1609709>
- 605 Hume, S., Dianov, G. L., & Ramadan, K. (2020). A unified model for the G1/S cell cycle  
606 transition. *Nucleic Acids Research*. <https://doi.org/10.1093/nar/gkaa1002>
- 607 Hydbring, P., Malumbres, M., & Sicinski, P. (2016). Non-canonical functions of cell cycle cyclins  
608 and cyclin-dependent kinases. In *Nature Reviews Molecular Cell Biology* (Vol. 17, Issue 5,  
609 pp. 280–292). Nature Publishing Group. <https://doi.org/10.1038/nrm.2016.27>
- 610 Kollmann, K., Heller, G., Schneckenleithner, C., Warsch, W., Scheicher, R., Ott, R. G., Schäfer,  
611 M., Fajmann, S., Schleder, M., Schiefer, A. I., Reichart, U., Mayerhofer, M., Hoeller, C.,  
612 Zöchbauer-Müller, S., Kerjaschki, D., Bock, C., Kenner, L., Hoefler, G., Freissmuth, M., ...  
613 Sexl, V. (2013). A kinase-independent function of CDK6 links the cell cycle to tumor  
614 angiogenesis. *Cancer Cell*, *24*(2), 167–181. <https://doi.org/10.1016/j.ccr.2013.07.012>
- 615 Labaer, J., Garrett, M. D., Stevenson, L. F., Slingerland, J. M., Sandhu, C., Chou, H. S., Fattaey,  
616 A., & Harlow, E. (1997). New functional activities for the p21 family of CDK inhibitors.  
617 *Genes and Development*, *11*(7), 847–862. <https://doi.org/10.1101/gad.11.7.847>
- 618 Libouban, M. A. A., de Roos, J. A. D. M., Uitdehaag, J. C. M., Willemsen-Seegers, N., Mainardi,  
619 S., Dylus, J., Man, J. de, Tops, B., Meijerink, J. P. P., Storchová, Z., Buijsman, R. C.,  
620 Medema, R. H., & Zaman, G. J. R. (2017). Stable aneuploid tumors cells are more sensitive  
621 to TTK inhibition than chromosomally unstable cell lines. *Oncotarget*, *8*(24), 38309–  
622 38325. <https://doi.org/10.18632/oncotarget.16213>
- 623 Lundberg, A. S., & Weinberg, R. A. (1998). Functional Inactivation of the Retinoblastoma  
624 Protein Requires Sequential Modification by at Least Two Distinct Cyclin-cdk Complexes.  
625 *Molecular and Cellular Biology*, *18*(2), 753–761. <https://doi.org/10.1128/mcb.18.2.753>
- 626 Narasimha, A. M., Kaulich, M., Shapiro, G. S., Choi, Y. J., Sicinski, P., & Dowdy, S. F. (2014).  
627 Cyclin D activates the Rb tumor suppressor by mono-phosphorylation. *ELife*, *3*, e02872.  
628 <https://doi.org/10.7554/eLife.02872>
- 629 Nathans, J. F., Cornwell, J. A., Afifi, M. M., Paul, D., & Cappell, S. D. (2021). Cell cycle inertia  
630 underlies a bifurcation in cell fates after DNA damage. *Science Advances*, *7*(3).  
631 <https://doi.org/10.1126/sciadv.abe3882>
- 632 Patnaik, A., Rosen, L. S., Tolaney, S. M., Tolcher, A. W., Goldman, J. W., Gandhi, L.,  
633 Papadopoulos, K. P., Beeram, M., Rasco, D. W., Hilton, J. F., Nasir, A., Beckmann, R. P.,

- 634 Schade, A. E., Fulford, A. D., Nguyen, T. S., Martinez, R., Kulanthaivel, P., Li, L. Q., Frenzel,  
635 M., ... Shapiro, G. I. (2016). Efficacy and safety of Abemaciclib, an inhibitor of CDK4 and  
636 CDK6, for patients with breast cancer, non-small cell lung cancer, and other solid tumors.  
637 *Cancer Discovery*, 6(7), 740–753. <https://doi.org/10.1158/2159-8290.CD-16-0095>
- 638 Pennycook, B. R., & Barr, A. R. (2020). Restriction point regulation at the crossroads between  
639 quiescence and cell proliferation. *FEBS Letters*, 594(13), 2046–2060.  
640 <https://doi.org/10.1002/1873-3468.13867>
- 641 Polyak, K., Kato, J. Y., Solomon, M. J., Sherr, C. J., Massague, J., Roberts, J. M., & Koff, A. (1994).  
642 p27(Kip1), a cyclin-Cdk inhibitor, links transforming growth factor- $\beta$  and contact  
643 inhibition to cell cycle arrest. *Genes and Development*, 8(1), 9–22.  
644 <https://doi.org/10.1101/gad.8.1.9>
- 645 Rader, J., Russell, M. R., Hart, L. S., Nakazawa, M. S., Belcastro, L. T., Martinez, D., Li, Y.,  
646 Carpenter, E. L., Attiyeh, E. F., Diskin, S. J., Kim, S., Parasuraman, S., Caponigro, G.,  
647 Schnepf, R. W., Wood, A. C., Pawel, B., Cole, K. A., & Maris, J. M. (2013). Dual CDK4/CDK6  
648 inhibition induces cell-cycle arrest and senescence in neuroblastoma. *Clinical Cancer*  
649 *Research*, 19(22), 6173–6182. <https://doi.org/10.1158/1078-0432.CCR-13-1675>
- 650 Ray, A., James, M. K., Larochelle, S., Fisher, R. P., & Blain, S. W. (2009). p27Kip1 Inhibits Cyclin  
651 D-Cyclin-Dependent Kinase 4 by Two Independent Modes. *Molecular and Cellular*  
652 *Biology*, 29(4), 986–999. <https://doi.org/10.1128/mcb.00898-08>
- 653 Rubin, S. M., Sage, J., & Skotheim, J. M. (2020). Integrating Old and New Paradigms of G1/S  
654 Control. *Molecular Cell*. <https://doi.org/10.1016/j.molcel.2020.08.020>
- 655 Salazar-Roa, M., & Malumbres, M. (2017). Fueling the Cell Division Cycle. In *Trends in Cell*  
656 *Biology* (Vol. 27, Issue 1, pp. 69–81). Elsevier Ltd.  
657 <https://doi.org/10.1016/j.tcb.2016.08.009>
- 658 Schade, A. E., Oser, M. G., Nicholson, H. E., & DeCaprio, J. A. (2019). Cyclin D-CDK4 relieves  
659 cooperative repression of proliferation and cell cycle gene expression by DREAM and RB.  
660 *Oncogene*, 38(25), 4962–4976. <https://doi.org/10.1038/s41388-019-0767-9>
- 661 Sherr, C. J., & Roberts, J. M. (1999). CDK inhibitors: Positive and negative regulators of G1-  
662 phase progression. In *Genes and Development* (Vol. 13, Issue 12, pp. 1501–1512). Cold  
663 Spring Harbor Laboratory Press. <https://doi.org/10.1101/gad.13.12.1501>
- 664 Simoneschi, D., Rona, G., Zhou, N., Jeong, Y.-T., Jiang, S., Milletti, G., Arbini, A. A., O’Sullivan,  
665 A., Wang, A. A., Nithikaseem, S., Keegan, S., Siu, Y., Cianfanelli, V., Maiani, E., Nazio, F.,  
666 Cecconi, F., Boccalatte, F., Fenyö, D., Jones, D. R., ... Pagano, M. (2021). CRL4AMBRA1 is  
667 a master regulator of D-type cyclins. *Nature*, 1–5. [https://doi.org/10.1038/s41586-021-](https://doi.org/10.1038/s41586-021-03445-y)  
668 [03445-y](https://doi.org/10.1038/s41586-021-03445-y)
- 669 Sledge, G. W., Toi, M., Neven, P., Sohn, J., Inoue, K., Pivot, X., Burdaeva, O., Okera, M.,  
670 Masuda, N., Kaufman, P. A., Koh, H., Grischke, E. M., Frenzel, M., Lin, Y., Barriga, S., Smith,  
671 I. C., Bourayou, N., & Llombart-Cussac, A. (2017). MONARCH 2: Abemaciclib in  
672 combination with fulvestrant in women with HR+/HER2-advanced breast cancer who  
673 had progressed while receiving endocrine therapy. *Journal of Clinical Oncology*, 35(25),  
674 2875–2884. <https://doi.org/10.1200/JCO.2017.73.7585>
- 675 Spring, L. M., Wander, S. A., Andre, F., Moy, B., Turner, N. C., & Bardia, A. (2020). Cyclin-  
676 dependent kinase 4 and 6 inhibitors for hormone receptor-positive breast cancer: past,  
677 present, and future. In *The Lancet* (Vol. 395, Issue 10226, pp. 817–827). Lancet Publishing  
678 Group. [https://doi.org/10.1016/S0140-6736\(20\)30165-3](https://doi.org/10.1016/S0140-6736(20)30165-3)

- 679 Swadling, J. B., Warnecke, T., Morris, K. L., & Barr, A. R. (2021). Conserved Cdk inhibitors show  
680 unique structural responses to tyrosine phosphorylation. *BioRxiv*, 2021.02.04.429742.  
681 <https://doi.org/10.1101/2021.02.04.429742>
- 682 Toogood, P. L., Harvey, P. J., Repine, J. T., Sheehan, D. J., VanderWel, S. N., Zhou, H., Keller, P.  
683 R., McNamara, D. J., Sherry, D., Zhu, T., Brodfuehrer, J., Choi, C., Barvian, M. R., & Fry, D.  
684 W. (2005). Discovery of a potent and selective inhibitor of cyclin-dependent kinase 4/6.  
685 *Journal of Medicinal Chemistry*, 48(7), 2388–2406. <https://doi.org/10.1021/jm049354h>
- 686 Topacio, B. R., Zatulovskiy, E., Cristea, S., Xie, S., Tambo, C. S., Rubin, S. M., Sage, J., Kõivomägi,  
687 M., & Skotheim, J. M. (2019). Cyclin D-Cdk4,6 Drives Cell-Cycle Progression via the  
688 Retinoblastoma Protein's C-Terminal Helix. *Molecular Cell*, 74(4), 758-770.e4.  
689 <https://doi.org/10.1016/J.MOLCEL.2019.03.020>
- 690 Tripathy, D., Bardia, A., & Sellers, W. R. (2017). Ribociclib (LEE011): Mechanism of Action and  
691 Clinical Impact of This Selective Cyclin-Dependent Kinase 4/6 Inhibitor in Various Solid  
692 Tumors. In *Clinical Cancer Research* (Vol. 23, Issue 13, pp. 3251–3262). American  
693 Association for Cancer Research Inc. <https://doi.org/10.1158/1078-0432.CCR-16-3157>
- 694 Trotter, E. W., & Hagan, I. M. (2020). Release from cell cycle arrest with Cdk4/6 inhibitors  
695 generates highly synchronized cell cycle progression in human cell culture. *Open Biology*,  
696 10(10), 200200. <https://doi.org/10.1098/rsob.200200>
- 697 Tsytlonok, M., Sanabria, H., Wang, Y., Felekyan, S., Hemmen, K., Phillips, A. H., Yun, M. K.,  
698 Waddell, M. B., Park, C. G., Vaithiyalingam, S., Iconaru, L., White, S. W., Tompa, P., Seidel,  
699 C. A. M., & Kriwacki, R. (2019). Dynamic anticipation by Cdk2/Cyclin A-bound p27  
700 mediates signal integration in cell cycle regulation. *Nature Communications*, 10(1), 1–13.  
701 <https://doi.org/10.1038/s41467-019-09446-w>
- 702 Vilgelm, A. E., Saleh, N., Shattuck-Brandt, R., Riemenschneider, K., Slesur, L., Chen, S. C.,  
703 Johnson, C. A., Yang, J., Blevins, A., Yan, C., Johnson, D. B., Al-Rohil, R. N., Halilovic, E.,  
704 Kauffmann, R. M., Kelley, M., Ayers, G. D., & Richmond, A. (2019). MDM2 antagonists  
705 overcome intrinsic resistance to CDK4/6 inhibition by inducing p21. *Science Translational  
706 Medicine*, 11(505), 7171. <https://doi.org/10.1126/scitranslmed.aav7171>
- 707 Wander, S. A., Cohen, O., Gong, X., Johnson, G. N., Buendia-Buendia, J. E., Lloyd, M. R., Kim,  
708 D., Luo, F., Mao, P., Helvie, K., Kowalski, K. J., Nayar, U., Waks, A. G., Parsons, S. H.,  
709 Martinez, R., Litchfield, L. M., Ye, X. S., Yu, C., Jansen, V. M., ... Wagle, N. (2020). The  
710 Genomic Landscape of Intrinsic and Acquired Resistance to Cyclin-Dependent Kinase 4/6  
711 Inhibitors in Patients with Hormone Receptor–Positive Metastatic Breast Cancer. *Cancer  
712 Discovery*, 10(8), 1174–1193. <https://doi.org/10.1158/2159-8290.CD-19-1390>
- 713 Wang, H., Nicolay, B. N., Chick, J. M., Gao, X., Geng, Y., Ren, H., Gao, H., Yang, G., Williams, J.  
714 A., Suski, J. M., Keibler, M. A., Sicinska, E., Gerdemann, U., Haining, W. N., Roberts, T. M.,  
715 Polyak, K., Gygi, S. P., Dyson, N. J., & Sicinski, P. (2017). The metabolic function of cyclin  
716 D3-CDK6 kinase in cancer cell survival. *Nature*, 546(7658), 426–430.  
717 <https://doi.org/10.1038/nature22797>
- 718 Wiedemeyer, W. R., Dunn, I. F., Quayle, S. N., Zhang, J., Chheda, M. G., Dunn, G. P., Zhuang,  
719 L., Rosenbluh, J., Chen, S., Xiao, Y., Shapiro, G. I., Hahn, W. C., & Chin, L. (2010). Pattern  
720 of retinoblastoma pathway inactivation dictates response to CDK4/6 inhibition in GBM.  
721 *Proceedings of the National Academy of Sciences of the United States of America*,  
722 107(25), 11501–11506. <https://doi.org/10.1073/pnas.1001613107>
- 723 Yang, H. W., Cappell, S. D., Jaimovich, A., Liu, C., Chung, M., Daigh, L. H., Pack, L. R., Fan, Y.,  
724 Regot, S., Covert, M., & Meyer, T. (2020). Stress-mediated exit to quiescence restricted

- 725 by increasing persistence in CDK4/6 activation. *ELife*, 9.  
726 <https://doi.org/10.7554/eLife.44571>
- 727 Yang, H. W., Chung, M., Kudo, T., & Meyer, T. (2017). Competing memories of mitogen and  
728 p53 signalling control cell-cycle entry. *Nature*, 549(7672), 404–408.  
729 <https://doi.org/10.1038/nature23880>
- 730 Yen, A., & Pardee, A. B. (1978). Exponential 3T3 cells escape in mid-G1 from their high serum  
731 requirement. *Experimental Cell Research*, 116(1), 103–113.  
732 [https://doi.org/10.1016/0014-4827\(78\)90068-x](https://doi.org/10.1016/0014-4827(78)90068-x)
- 733 Young, R. J., Waldeck, K., Martin, C., Foo, J. H., Cameron, D. P., Kirby, L., Do, H., Mitchell, C.,  
734 Cullinane, C., Liu, W., Fox, S. B., Dutton-Regester, K., Hayward, N. K., Jene, N., Dobrovic,  
735 A., Pearson, R. B., Christensen, J. G., Randolph, S., McArthur, G. A., & Sheppard, K. E.  
736 (2014). Loss of CDKN2A expression is a frequent event in primary invasive melanoma and  
737 correlates with sensitivity to the CDK4/6 inhibitor PD0332991 in melanoma cell lines.  
738 *Pigment Cell and Melanoma Research*, 27(4), 590–600.  
739 <https://doi.org/10.1111/pcmr.12228>
- 740 Zerjatke, T., Gak, I. A., Kirova, D., Fuhrmann, M., Daniel, K., Gonciarz, M., Müller, D., Glauche,  
741 I., & Mansfeld, J. (2017). Quantitative Cell Cycle Analysis Based on an Endogenous All-in-  
742 One Reporter for Cell Tracking and Classification. *Cell Reports*, 19(9), 1953–1966.  
743 <https://doi.org/10.1016/j.celrep.2017.05.022>
- 744 Zhao, B., & Burgess, K. (2019). PROTACs suppression of CDK4/6, crucial kinases for cell cycle  
745 regulation in cancer. *Chemical Communications*, 55(18), 2704–2707.  
746 <https://doi.org/10.1039/c9cc00163h>

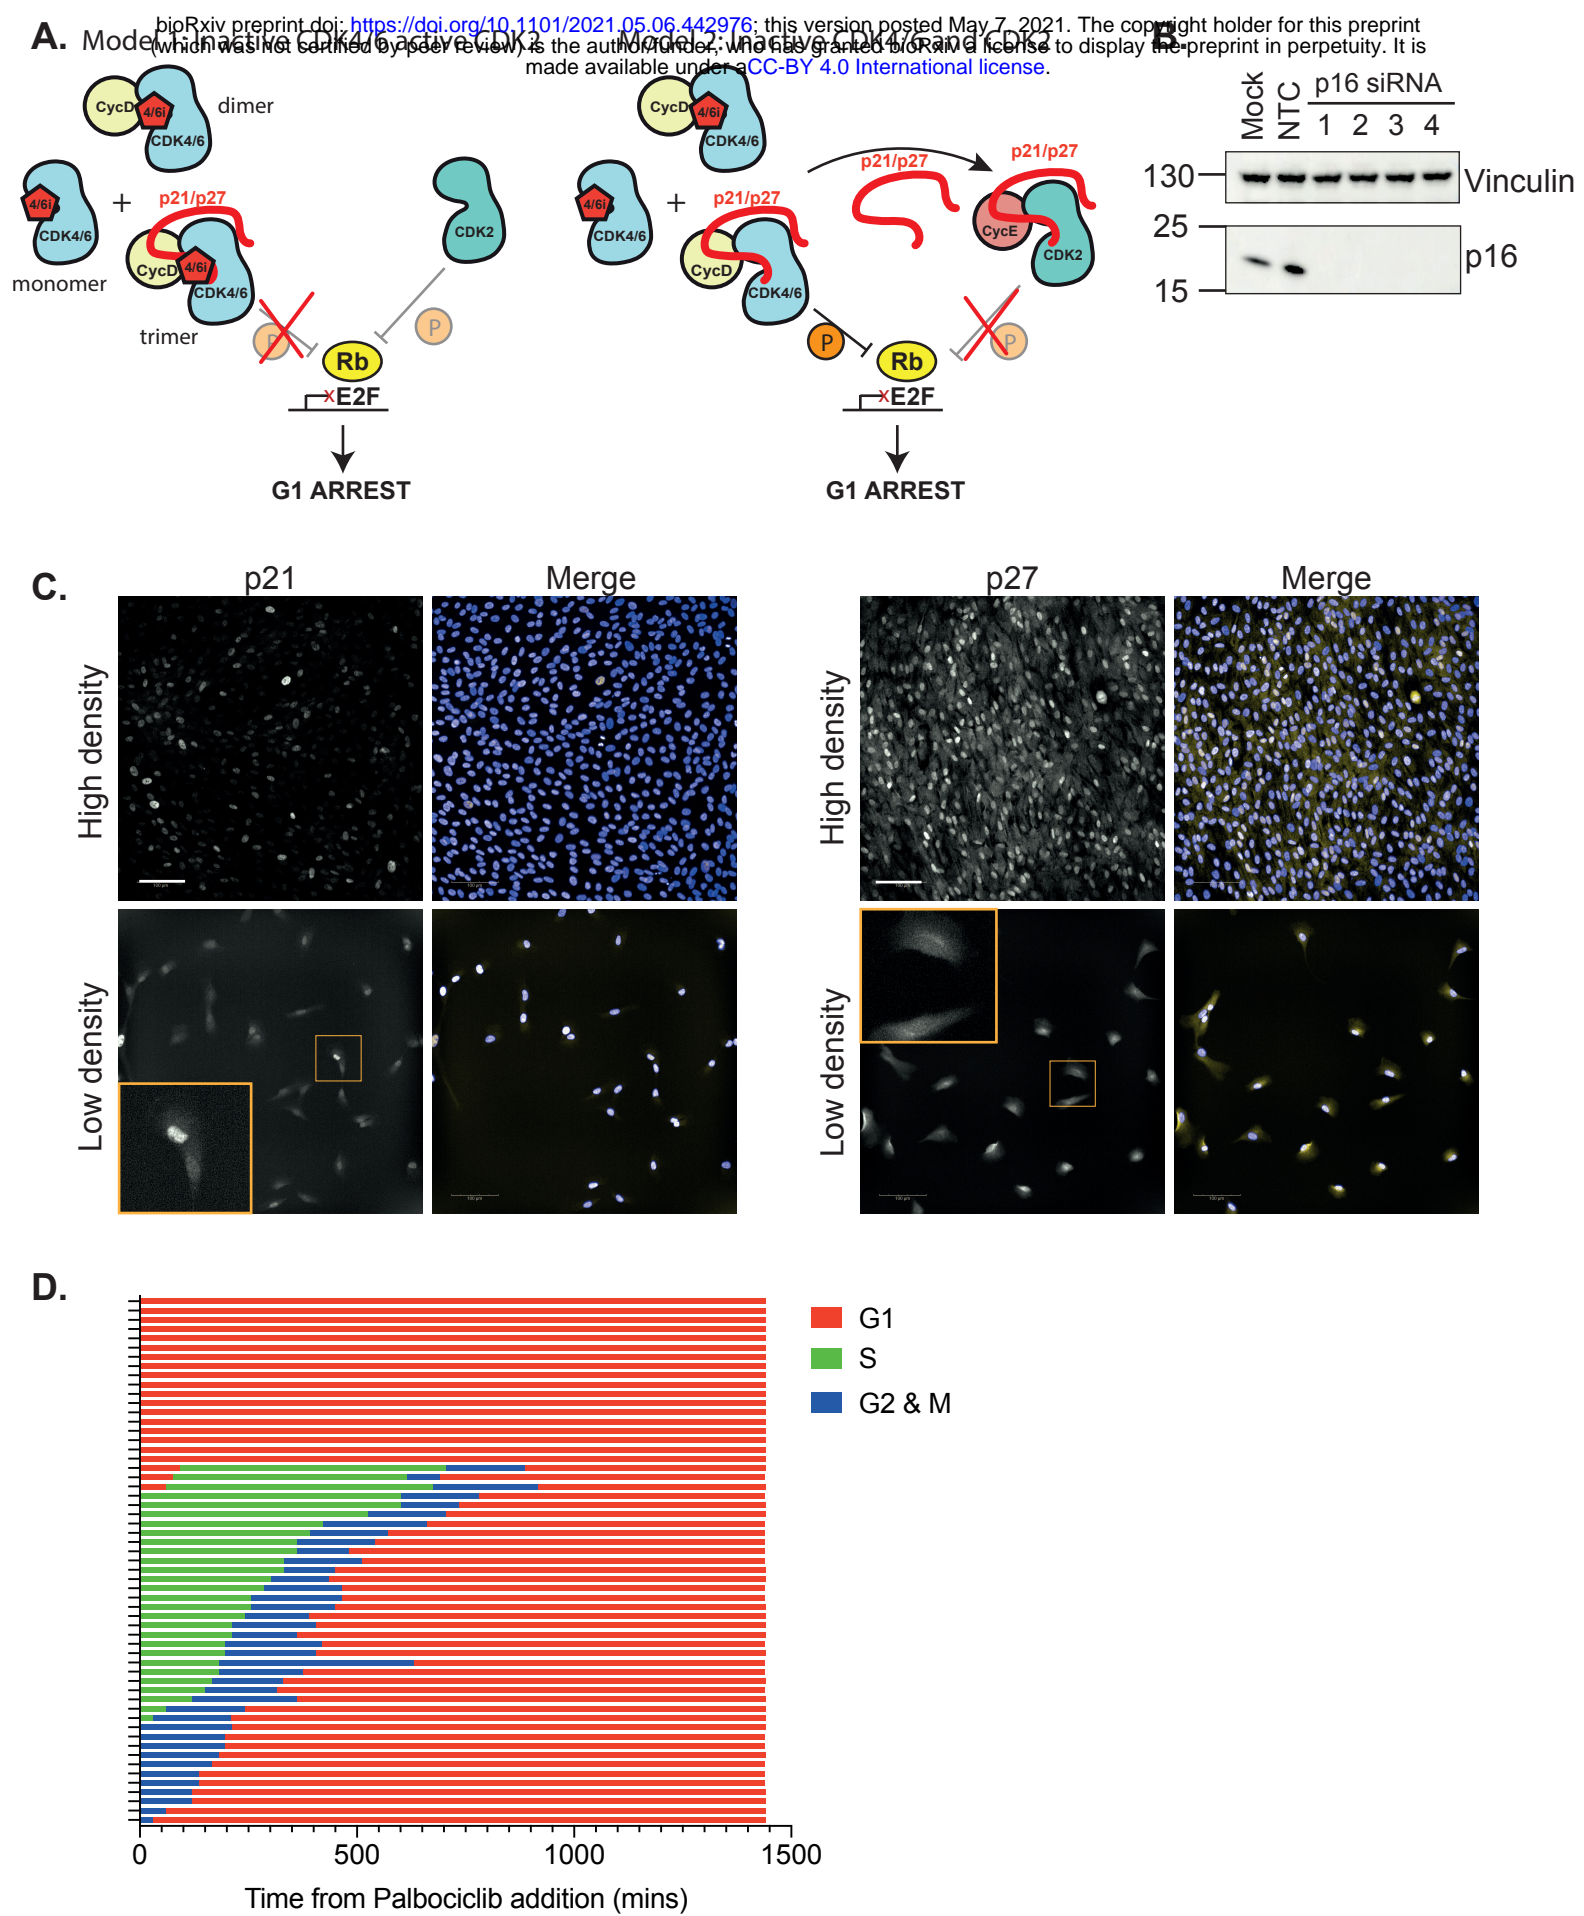

Figure 1

756 **Figure 1.** p21 correlates with Cyclin D1 expression and Palbociclib is only effective in  
757 G1 in hTert-RPE1 cells. **A.** Models of Palbociclib mechanism of action. Model 1: direct  
758 inhibition of CDK4/6 catalytic activity by Palbociclib. Palbociclib binds and inhibits  
759 CDK4/6 monomers, CyclinD:CDK4/6 dimers and Cip/Kip:CyclinD:CDK4/6 trimers.  
760 Depending when in the cell cycle Palbociclib is added, CDK2 would be active or  
761 inactive depending on Cyclin E/A expression. In this model CDK4/6 complexes titrate  
762 p21/p27 from CDK2 complexes. Model 2: indirect inhibition of CDK2 activity through  
763 redistribution of Cip/Kip inhibitor proteins. Palbociclib binds and inhibits CDK4/6  
764 monomers and CyclinD:CDK4/6 dimers but not Cip/Kip:CyclinD:CDK4/6 trimers.  
765 Cip/Kip redistribution from CDK4/6 complexes to CDK2 results in cell cycle arrest. **B.**  
766 Western blot showing expression of p16 in hTert-RPE1 cells. Cells were treated with  
767 increasing concentrations (1 = 25 nM, 2 = 50 nM, 3 = 75 nM, 4= 100 nM) of siRNA  
768 targeting CDKN2A for 48 h. Vinculin is included as a loading control. NTC = Non-  
769 targeting control siRNA. **C.** Images show hTert-RPE1 cells plated at high density or  
770 low density and fixed and stained for p21 (left-hand side) or p27 (right-hand side; both  
771 yellow in merged image) and Hoescht (blue in merged image). Insets in lower panels  
772 show magnified images of cells in the image to highlight lack of nuclear p27 in cells  
773 cycling at low density. Scale bar is 100  $\mu$ m. **D.** Graph shows how cell cycle stage  
774 affects response to Palbociclib addition. hTert-RPE1 mRuby-PCNA cells were imaged  
775 after Palbociclib addition at time 0 and cells were manually analysed to determine cell  
776 cycle phenotypes. Each row represents a single cell (n=57 cells) and only one  
777 daughter cell was followed post-mitosis. See Supplementary Movie 1 for an example  
778 of the imaging data.



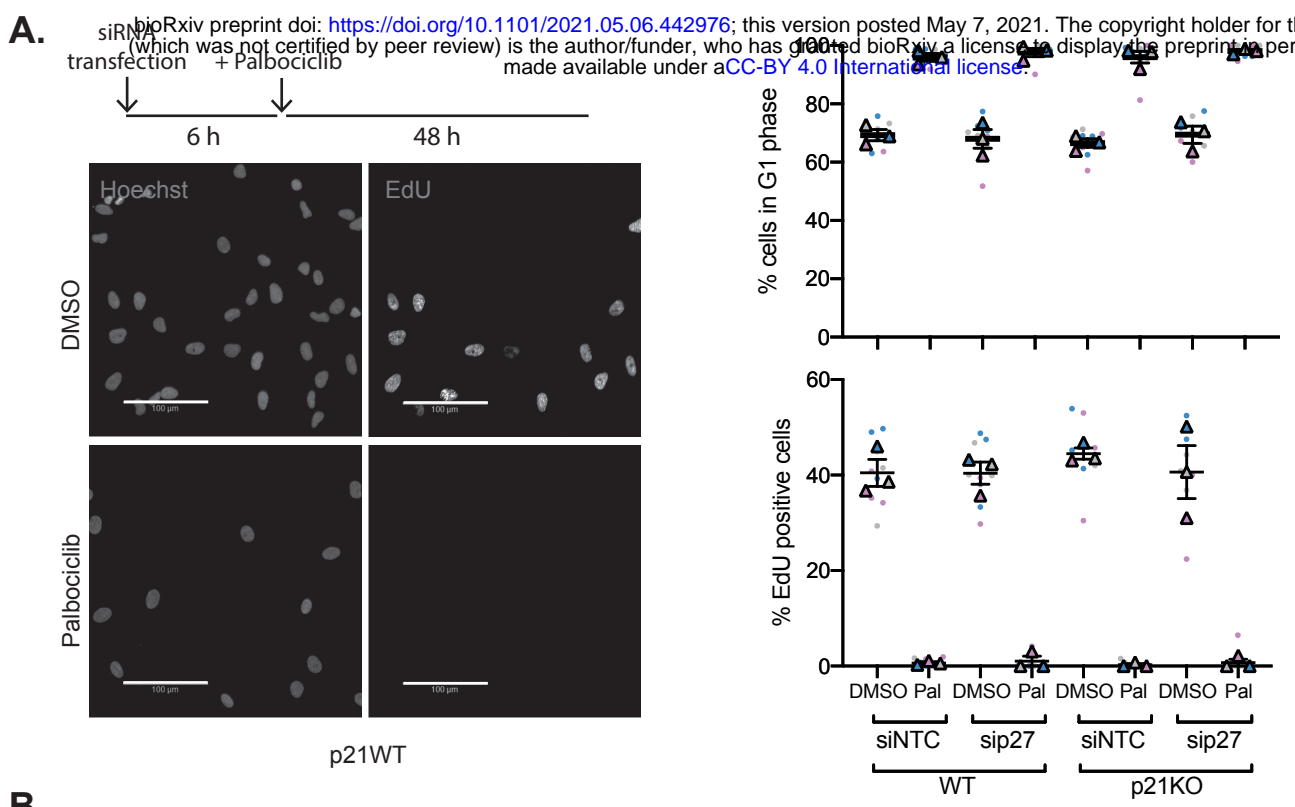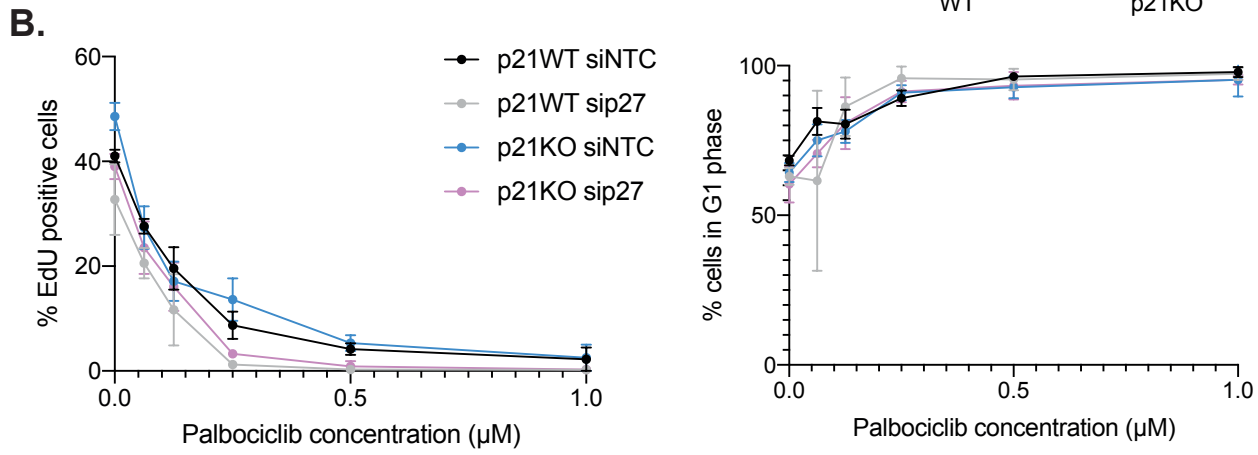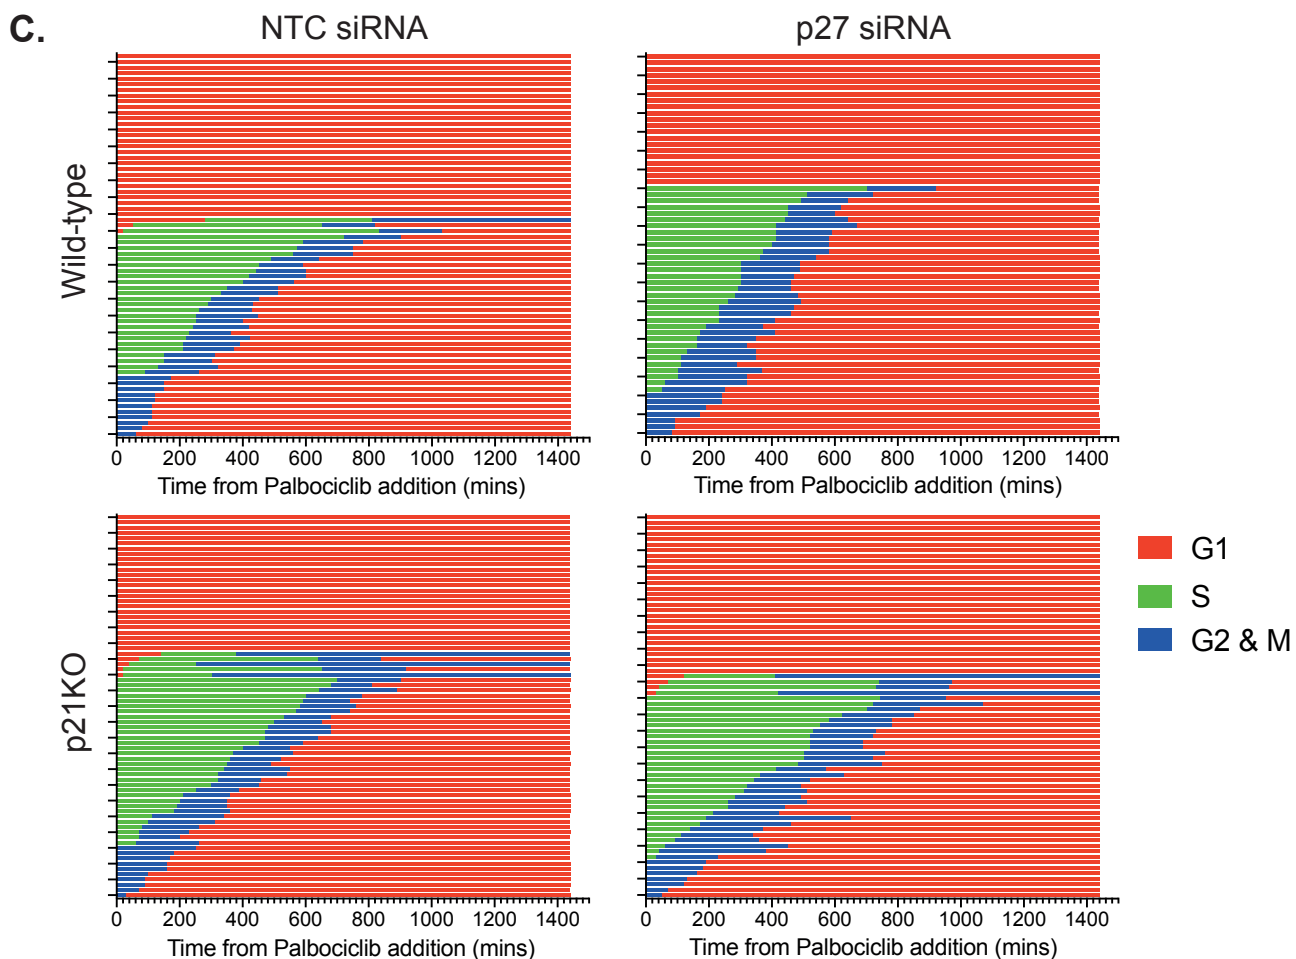

Figure 2

779 **Figure 2.** p21 and p27 are not required for Palbociclib-mediated arrest in hTert-RPE1  
780 cells. **A.** hTert-RPE1 p21KO cells were reverse transfected with siNTC or sip27 and  
781 treated with DMSO or Palbociclib 6 h after plating, as indicated. Cells were pulse  
782 labelled with 10  $\mu$ M EdU for 30 min before fixation 48 h following drug treatment. EdU  
783 positive cells quantified as cells with a nuclear:cytoplasmic ratio of EdU signal as  
784 greater than or equal to 1.2. Right, cells were classified in G1 phase according to their  
785 DNA content as quantified by Hoechst nuclear sum intensity. Dots in superplots  
786 represent replicate wells, colour coded by experimental repeat, triangles represent  
787 mean values for each of n=3 experimental repeats with mean and SEM shown. Scale  
788 bar, 100  $\mu$ m. **B.** hTert-RPE1 mRuby-PCNA p21 WT and p21KO cells were treated  
789 with the indicated concentrations of Palbociclib for 48 h before 30 min EdU pulse and  
790 fixation. Superplot of percentage of EdU positive cells, left, and of cells in G1 phase,  
791 right. Mean and SEM from n=3 experimental repeat shown on error bars. **C.** Graphs  
792 show timing of cell cycle arrest when Palbociclib is added to asynchronous cells (at 0  
793 mins) and imaged by live cell imaging. Cell cycle phenotypes were monitored and  
794 tracked manually over 24 hrs using mRuby-PCNA as a readout. Three fields of view  
795 were quantified per condition. Each row represents an individual cell. Wild-type NTC  
796 siRNA n=68, wild-type p27 siRNA n=61, p21KO NTC siRNA n=73 and p21KO  
797 p27siRNA n=70 cells.

**A.**

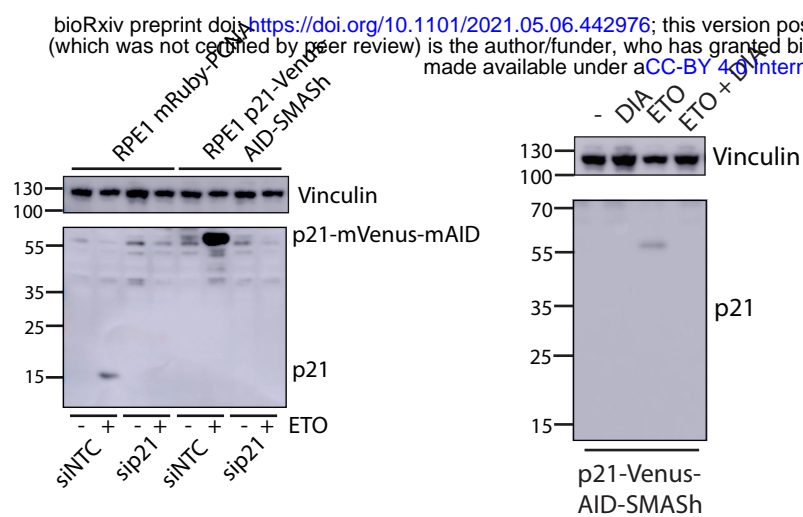

**B.**

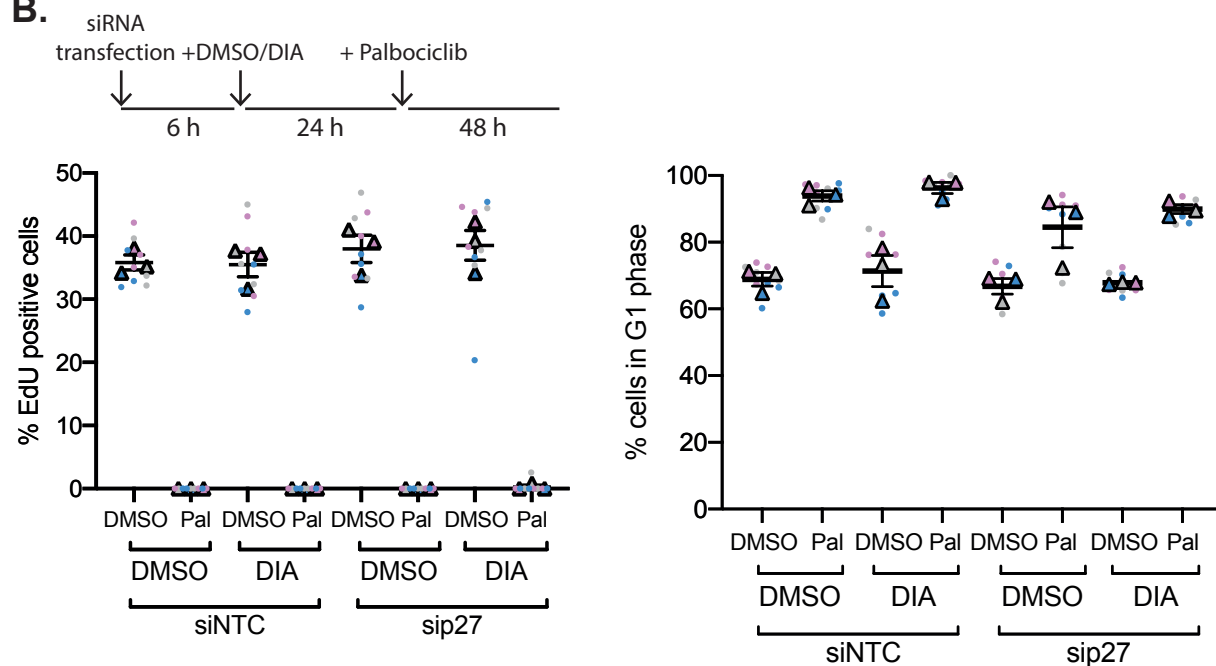

**Figure 3**

798 **Figure 3.** Generation of p21-degron lines **A.** Western blot of whole cell extract from  
799 indicated cell lines probing for p21, indicating all p21 expressed in the hTert-RPE1  
800 OsTIR1 mRuby-PCNA p21-mVenus-mAID-SMASH cell line is tagged with mVenus-  
801 mAID. Cells were reverse transfected with the indicated siRNAs, non-targeting control  
802 (NTC) or p27 and collected after 48 h. 10  $\mu$ M Etoposide (ETO) was added 24h prior  
803 to sample collection to induce DNA damage as p21 expression is low in untreated  
804 hTert-RPE1 cells. p21-mVenus-mAID has a predicted molecular weight of 55 kDa, no  
805 p21-mVenus-mAID-SMASH is detected as the SMASH tag self-cleaves from the  
806 protein. Vinculin was used as a loading control. Right, western blot of whole cell extract  
807 indicating that p21-mVenus-AID-SMASH is degraded following DIA (doxycycline, IAA  
808 and ASV) addition after induction of p21 expression by ETO. ETO and DIA:  
809 Doxycycline (1  $\mu$ g/ml), IAA (500  $\mu$ M) and ASV (3  $\mu$ M) were added 24 h before sample  
810 collection. **B.** hTert-RPE1 mRuby-PCNA p21-Venus-AID-SMASH cells were reverse  
811 transfected with the indicated siRNAs, 6 h later DMSO or DIA were added as indicated,  
812 and 24 h DMSO or Palbociclib added for 48 h. Cells were pulse labelled with EdU  
813 before fixation and EdU incorporation and G1 percentage were quantified.

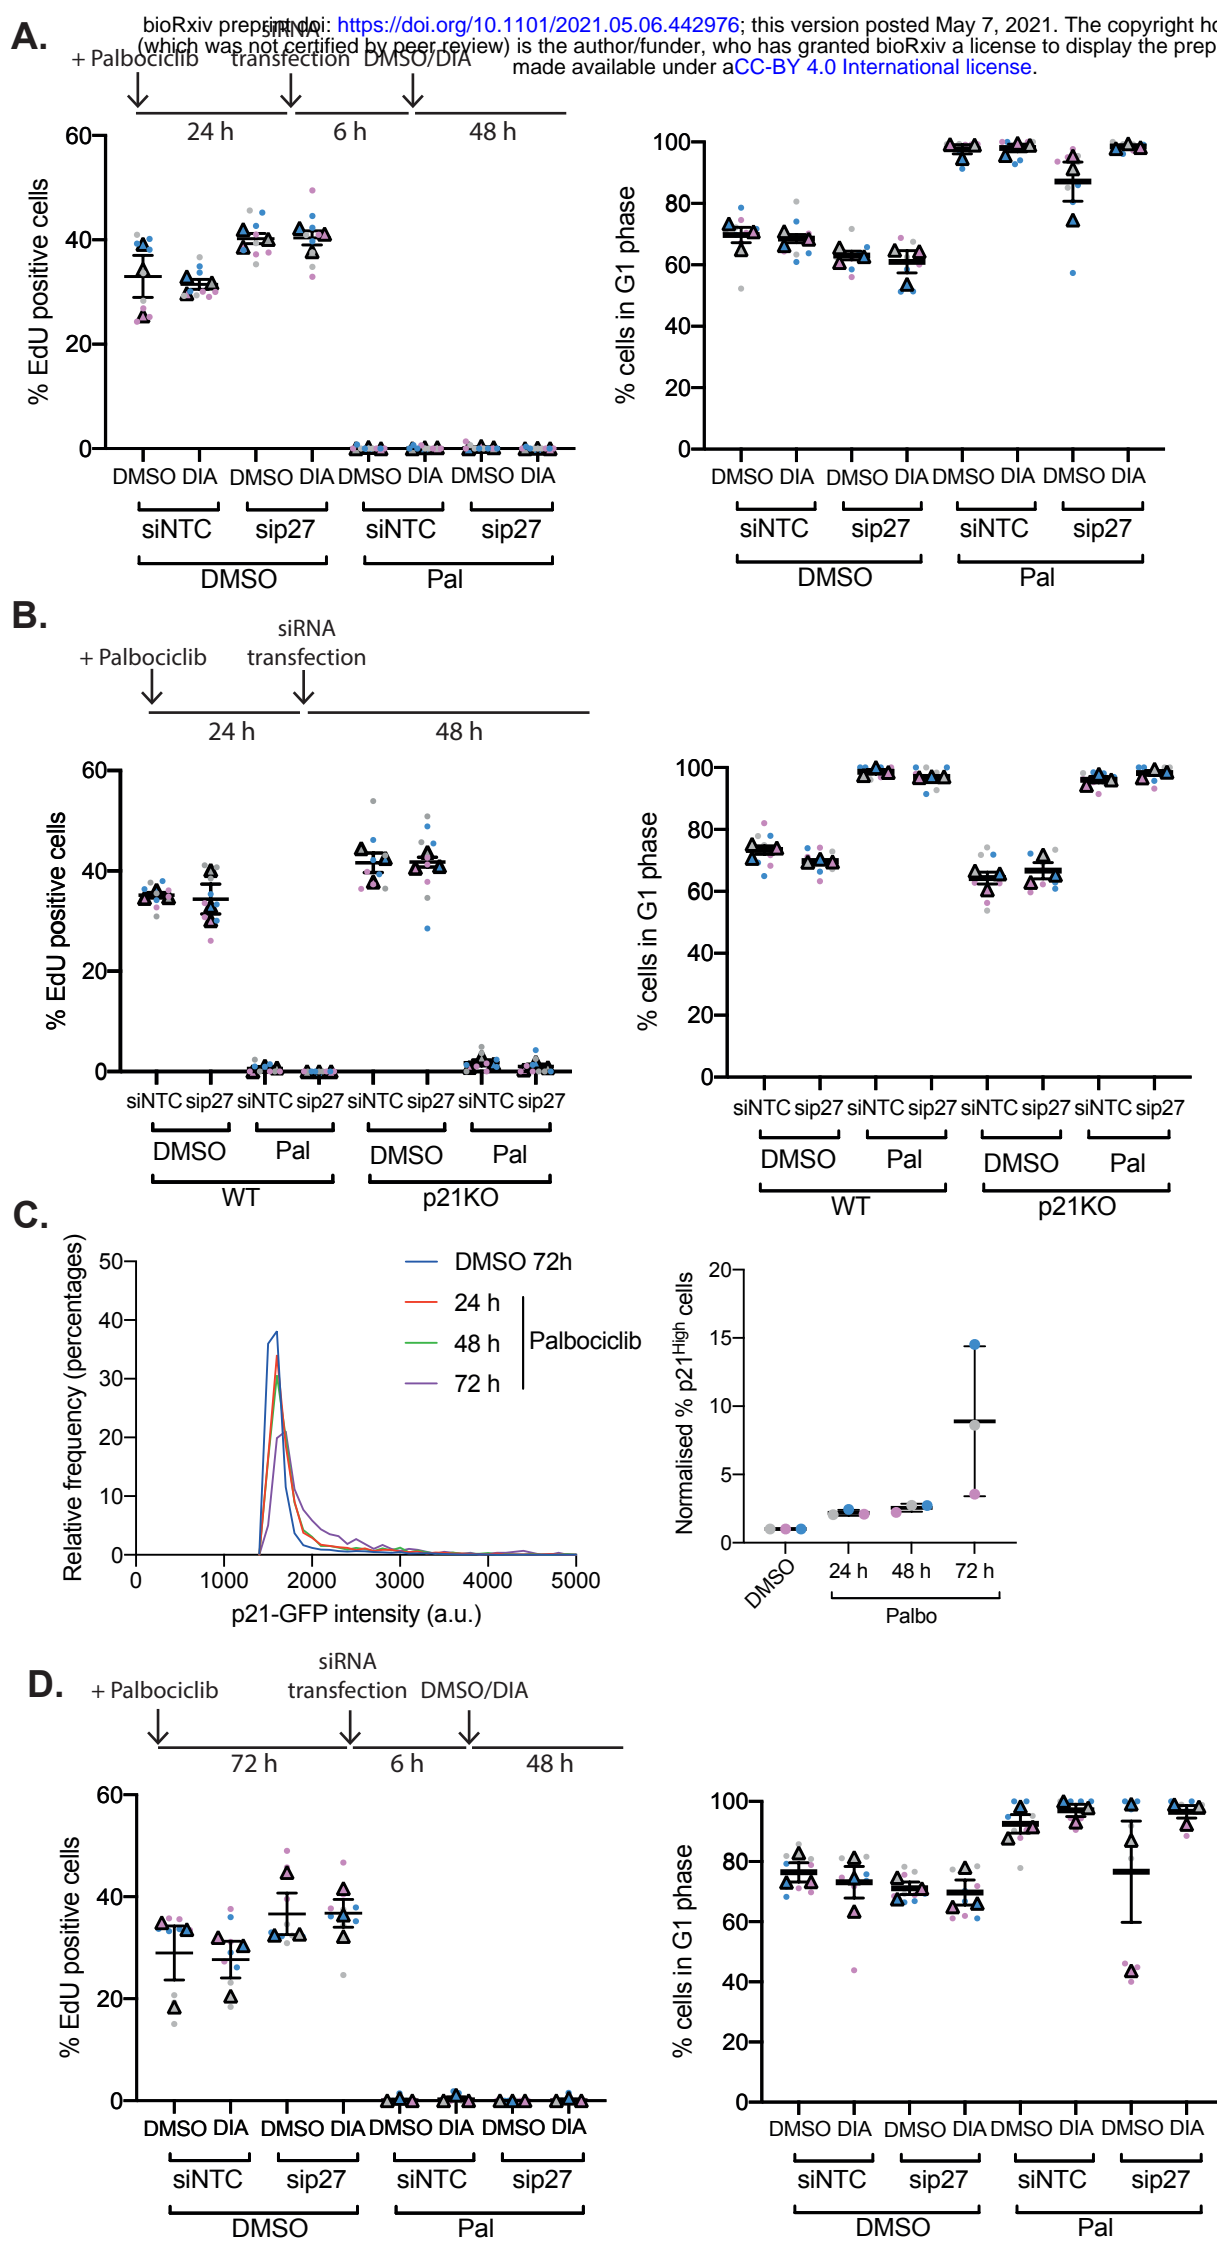

Figure 4

814 **Figure 4.** Palbociclib-dependent arrest can be maintained in the absence of p21/p27.  
815 **A.** hTert-RPE1 p21WT and KO cells were treated with DMSO/Palbociclib, transfected  
816 with the indicated siRNAs 18 h later, then treated with DIA 6 h following transfection.  
817 Cells were pulse labelled for 30 minutes with 10  $\mu$ M EdU and fixed 48 h following DIA  
818 addition. Dots represent replicate wells, colour coded by experimental repeat.  
819 Triangles represent mean values for each experimental repeat with mean and SEM  
820 shown. **B.** hTert-RPE1 p21-degron cells were treated with DMSO/Palbociclib,  
821 transfected with the indicted siRNAs 24 h after drug treatment, then treated with  
822 DMSO/DIA 6 h following transfection. 48 h after DIA addition, cells were pulse labelled  
823 with 10  $\mu$ M EdU for 30 minutes and fixed. **C.** hTert-RPE1 mRuby-PCNA p21GFP cells  
824 were treated with DMSO for 72 h or Palbociclib for the indicated times, and p21GFP  
825 levels quantified. Representative frequency distribution of measured intensities from  
826 one experimental repeat shown. Right, percentage of cells classified as p21 high  
827 above a threshold of p21 intensity, n=3 experiments shown. Data was normalised to  
828 72 h DMSO treatment within each experimental repeat. **D.** hTert-RPE1 p21-degron  
829 cells were treated with DMSO/Palbociclib for 72 h, transfected, then DMSO/DIA added  
830 6 h later. Cells were pulse labelled with 10  $\mu$ M EdU for 30 minutes 48 h after DIA  
831 addition.

**Table 1.** Predictions of sensitivity to CDK4/6 inhibitors.

| Dependence on CDK4/6 | p21/p27 levels | CDK4/6 inhibitor sensitivity prediction |
|----------------------|----------------|-----------------------------------------|
| Yes                  | High/normal    | Yes – both mechanisms                   |
| Yes                  | Low            | Yes – direct inhibition                 |
| No                   | High           | Yes – indirect mechanism                |
| No                   | Low            | No                                      |
